# Supplementary material for: Comprehensive mapping of NICU developmental care nursing interventions and related sensitive outcome indicators: a scoping review protocol
Source: PubMed Central journal article supplement — BMJ Open. 2022 Jan 31;12(1):e046807. doi: 10.1136/bmjopen-2020-046807 (PMC8808373; doi:10.1136/bmjopen-2020-046807), 2022-01-31
Supplement: bmjopen-2020-046807.draft_revisions.pdf [file bmjopen-2020-046807.draft_revisions.pdf]

# BMJ Open

BMJ Open is committed to open peer review. As part of this commitment we make the peer review history of every article we publish publicly available.

When an article is published we post the peer reviewers' comments and the authors' responses online. We also post the versions of the paper that were used during peer review. These are the versions that the peer review comments apply to.

The versions of the paper that follow are the versions that were submitted during the peer review process. They are not the versions of record or the final published versions. They should not be cited or distributed as the published version of this manuscript.

BMJ Open is an open access journal and the full, final, typeset and author-corrected version of record of the manuscript is available on our site with no access controls, subscription charges or pay-per-view fees (<http://bmjopen.bmj.com>).

If you have any questions on BMJ Open's open peer review process please email [info.bmjopen@bmj.com](mailto:info.bmjopen@bmj.com)

# BMJ Open

## Nursing developmental care interventions for preterm infants in the neonatal intensive care unit: A scoping review protocol

|                               |                                                                                                                                                                                                                                                                                                                                                                                                                                                                                                                                                                                                                                                                                                                                                                                                                               |
|-------------------------------|-------------------------------------------------------------------------------------------------------------------------------------------------------------------------------------------------------------------------------------------------------------------------------------------------------------------------------------------------------------------------------------------------------------------------------------------------------------------------------------------------------------------------------------------------------------------------------------------------------------------------------------------------------------------------------------------------------------------------------------------------------------------------------------------------------------------------------|
| Journal:                      | <i>BMJ Open</i>                                                                                                                                                                                                                                                                                                                                                                                                                                                                                                                                                                                                                                                                                                                                                                                                               |
| Manuscript ID                 | bmjopen-2020-046807                                                                                                                                                                                                                                                                                                                                                                                                                                                                                                                                                                                                                                                                                                                                                                                                           |
| Article Type:                 | Protocol                                                                                                                                                                                                                                                                                                                                                                                                                                                                                                                                                                                                                                                                                                                                                                                                                      |
| Date Submitted by the Author: | 09-Nov-2020                                                                                                                                                                                                                                                                                                                                                                                                                                                                                                                                                                                                                                                                                                                                                                                                                   |
| Complete List of Authors:     | Héon , Marjolaine; Université de Montréal, Faculty of Nursing; Réseau de Recherche portant sur les Interventions en Sciences Infirmières du Québec<br>Aïta, Marilyn; Université de Montréal, Faculty of Nursing; CHU Sainte-Justine Centre de Recherche<br>Lavallée, Andréane; Université de Montréal, Faculty of Nursing; Centre Hospitalier Universitaire Sainte-Justine, Research Center<br>De Clifford-Faugère, Gwenaëlle; Université de Montréal, Faculty of Nursing; CHU Sainte-Justine Centre de Recherche<br>Laporte, Geneviève; Université de Montréal, Faculty of Nursing; CHU Sainte-Justine Centre de Recherche<br>Boisvert, Annie; Université de Montréal, Faculty of Nursing; CHU Sainte-Justine, Neonatology<br>Feeley, Nancy; McGill University, School of Nursing; Lady Davis Institute for Medical Research |
| Keywords:                     | Neonatal intensive & critical care < INTENSIVE & CRITICAL CARE, NEONATOLOGY, PERINATOLOGY                                                                                                                                                                                                                                                                                                                                                                                                                                                                                                                                                                                                                                                                                                                                     |
|                               |                                                                                                                                                                                                                                                                                                                                                                                                                                                                                                                                                                                                                                                                                                                                                                                                                               |

SCHOLARONE™  
Manuscripts

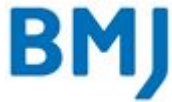

I, the Submitting Author has the right to grant and does grant on behalf of all authors of the Work (as defined in the below author licence), an exclusive licence and/or a non-exclusive licence for contributions from authors who are: i) UK Crown employees; ii) where BMJ has agreed a CC-BY licence shall apply, and/or iii) in accordance with the terms applicable for US Federal Government officers or employees acting as part of their official duties; on a worldwide, perpetual, irrevocable, royalty-free basis to BMJ Publishing Group Ltd ("BMJ") its licensees and where the relevant Journal is co-owned by BMJ to the co-owners of the Journal, to publish the Work in this journal and any other BMJ products and to exploit all rights, as set out in our [licence](#).

The Submitting Author accepts and understands that any supply made under these terms is made by BMJ to the Submitting Author unless you are acting as an employee on behalf of your employer or a postgraduate student of an affiliated institution which is paying any applicable article publishing charge ("APC") for Open Access articles. Where the Submitting Author wishes to make the Work available on an Open Access basis (and intends to pay the relevant APC), the terms of reuse of such Open Access shall be governed by a Creative Commons licence – details of these licences and which [Creative Commons](#) licence will apply to this Work are set out in our licence referred to above.

Other than as permitted in any relevant BMJ Author's Self Archiving Policies, I confirm this Work has not been accepted for publication elsewhere, is not being considered for publication elsewhere and does not duplicate material already published. I confirm all authors consent to publication of this Work and authorise the granting of this licence.

1  
2  
3 1 **Nursing developmental care interventions for preterm infants in the neonatal**  
4  
5 2 **intensive care unit: A scoping review protocol**

6  
7  
8 3 **Marjolaine Héon, RN, Ph.D.<sup>1,2</sup> (corresponding author)**

9 4 <sup>1</sup>Faculty of Nursing, Université de Montréal, Montreal, Quebec, Canada

10 5 <sup>2</sup> Quebec Network on Nursing Intervention Research (RRISIQ), Montreal, Quebec, Canada

11 6 Email: [marjolaine.heon@umontreal.ca](mailto:marjolaine.heon@umontreal.ca)

12 7 ORCID: <https://orcid.org/0000-0001-7450-1797>

13 8  
14  
15  
16 9 **Marilyn Aita, RN, Ph.D.<sup>1,2,3</sup>**

17 10 <sup>1</sup>Faculty of Nursing, Université de Montréal, Montreal, Quebec, Canada

18 11 <sup>2</sup>CHU Sainte-Justine Research Centre, Montreal, Quebec, Canada

19 12 <sup>3</sup> Quebec Network on Nursing Intervention Research (RRISIQ), Montreal, Quebec, Canada

20 13 Email: [marilyn.aita@umontreal.ca](mailto:marilyn.aita@umontreal.ca)

21 14 ORCID: <https://orcid.org/0000-0002-6197-8796>

22 15  
23 16 **Andréane Lavallée, RN, PhD (c)<sup>1,2</sup>**

24 17 <sup>1</sup>Faculty of Nursing, Université de Montréal, Montréal, Québec, Canada

25 18 <sup>2</sup>CHU Sainte-Justine Research Centre, Montreal, Quebec, Canada

26 19 Email : [andreane.lavallee@umontreal.ca](mailto:andreane.lavallee@umontreal.ca)

27 20 ORCID : <https://orcid.org/0000-0001-5702-3084>

28 21  
29 22 **Gwenaëlle De Clifford-Faugère, RN, M.Sc., PhD(c)<sup>1,2,4</sup>**

30 23 <sup>1</sup>Faculty of Nursing, Université de Montréal, Montreal, Quebec, Canada

31 24 <sup>2</sup>CHU Sainte-Justine Research Centre, Montreal, Quebec, Canada

32 25 <sup>4</sup>Faculté des Sciences Médicales et Paramédicales, Aix Marseille Université, EA3279-CEReSS,  
33 26 Marseille, France

34 27 Email: [gwenaelle.de.clifford@umontreal.ca](mailto:gwenaelle.de.clifford@umontreal.ca)

35 28 ORCID: <https://orcid.org/0000-0002-9719-5531>

36 29  
37 30 **Geneviève Laporte, RN, Doctoral student<sup>1,2</sup>**

38 31 <sup>1</sup>Faculty of Nursing, Université de Montréal, Montreal, Quebec, Canada

39 32 <sup>2</sup>CHU Sainte-Justine Research Centre, Montreal, Quebec, Canada

40 33 Email : [genevieve.laporte.1@umontreal.ca](mailto:genevieve.laporte.1@umontreal.ca)

41 34 ORCID : <https://orcid.org/0000-0002-3612-8546>

42 35  
43 36 **Annie Boisvert, RN, Master student<sup>1,2</sup>**

44 37 <sup>1</sup>Faculty of Nursing, Université de Montréal, Montreal, Quebec, Canada

45 38 <sup>2</sup>CHU Sainte-Justine, Montreal, Quebec, Canada

46 39 Email: [annie.boisvert.5@umontreal.ca](mailto:annie.boisvert.5@umontreal.ca)

1  
2  
3  
4  
5  
6  
7  
8  
9  
10  
11  
12  
13  
14  
15  
16  
17  
18  
19  
20  
21  
22  
23  
24  
25  
26  
27  
28  
29  
30  
31  
32  
33  
34  
35  
36  
37  
38  
39  
40  
41  
42  
43  
44  
45  
46  
47  
48  
49  
50  
51  
52  
53  
54  
55  
56  
57  
58  
59  
60

40

41 **Nancy Feeley, RN, PhD** <sup>3,5,6</sup>

<sup>3</sup> Quebec Network on Nursing Intervention Research (RRISIQ), Montreal, Quebec, Canada

<sup>5</sup> Ingram School of Nursing, McGill University, Montreal, Quebec, Canada

<sup>6</sup> Centre for Nursing Research and Lady Davis Institute, Jewish General Hospital, Montreal, Quebec, Canada

**Email :** [nancy.feeley@mcgill.ca](mailto:nancy.feeley@mcgill.ca)

**ORCID :** <https://orcid.org/0000-0003-2836-4116>

48

**Word count** (excluding title page, abstract, references, figures and tables): 2740 words.

Or peer review only

## 50 ABSTRACT

51 **Introduction:** Neurodevelopmental outcomes of preterm infant are still a contemporary concern. To  
52 counter the detrimental effects resulting from the hospitalization in the Neonatal Intensive Care Unit (NICU),  
53 Developmental Care (DC) interventions have emerged as a philosophy of care aimed at protecting and  
54 enhancing preterm infant's development and promoting parental outcomes. In the past two decades, many  
55 authors have suggested DC models, measures and guidelines but outlined different groupings of  
56 interventions rather than specific interventions that can be used in NICU clinical practice. Moreover, as  
57 these DC interventions are mostly implemented by neonatal nurses, it would be strategic and valuable to  
58 identify specific indicators to make visible the contribution of NICU nurses to DC. Objectives: The  
59 overarching objective of this review is to identify the nature, range and extent of the literature regarding DC  
60 nursing interventions for preterm infants in the NICU. The secondary twofold objectives are to highlight  
61 specific nursing interventions that fall into identified categories of DC interventions and suggest indicators  
62 sensitive to neonatal nursing DC interventions in the NICU. Inclusion criteria: Papers reporting on or  
63 discussing a DC nursing intervention during NICU hospitalization will be included.

64 **Methods and analysis:** The Joanna Briggs Institute's methodology for scoping reviews will be followed.  
65 CINAHL, MEDLINE, Embase, PubMed, Web of Science, Scopus, ProQuest and PsychInfo databases from  
66 2009 to the present will be searched. Any type of paper, published in English or French, will be considered.  
67 Study selection and data extraction will be conducted by pairs of two review authors independently. A  
68 qualitative content analysis will be conducted.

69 **Ethics and dissemination:** No Institutional Review Board ethical approbation is needed. Results of this  
70 review will be presented in scientific meetings and published in refereed papers.

71 **Keywords:** neonatal intensive care unit; developmental care; nursing care; preterm infant; scoping review.

## 72 **STRENGTHS AND LIMITATIONS OF THIS STUDY**

- 73 • First scoping review that aims to identify sensitive indicators of neonatal nursing developmental care  
74 interventions in the NICU.
- 75 • New comprehensive and inclusive categories of developmental care interventions orient this scoping  
76 review.
- 77 • Both researchers and clinicians with expertise in neonatal intensive care nursing and developmental  
78 care for preterm infants and their families collaborate to conduct this scoping review.
- 79 • The literature search will include literature published in both French and English.
- 80 • As the scope of this review is large and the literature search strategy is very sensitive, it will include  
81 all relevant literature but might lack specificity.
- 82 • This scoping review protocol follows the recommendations of the Joanna Briggs Institute for the  
83 conduct of systematic and rigorous reviews.

84

## 85 INTRODUCTION

86 Short and long-term neurodevelopmental outcomes are still a contemporary concern for infants that are  
87 born preterm, that is before the 37<sup>th</sup> week of gestation (WG) is completed,[1-3]. Compared to term infants,  
88 school-aged children born preterm have significant deficits in mathematics and reading,[1], present with  
89 lower Intellectual Quotients (IQ),[4], and are at increased risk for anxiety and hyperactivity disorders,[5].  
90 Throughout adulthood, young adults born preterm are still facing significant social-emotional difficulties,[3],  
91 present with lower IQ,[6], are even at increased risk for autistic symptoms,[7], and obtain lower scores on  
92 neuropsychological tests,[2]. The hospitalization in the Neonatal Intensive Care Unit (NICU) has been  
93 identified as a strategic period to implement interventions to protect and optimize preterm infant's  
94 neurodevelopment,[8]. In fact, the most important maturation processes of the central nervous system occur  
95 between the 24<sup>th</sup> and the 40<sup>th</sup> WG,[9].

96 The concept of Developmental Care (DC), based on the work of Dr. Heidelise Als,[10], is a neuroprotective  
97 NICU care philosophy that ultimately intends to promote optimal health outcomes in preterm infants and  
98 their families,[11-13]. An important aspect of DC is the individualisation of care that should match each  
99 infant and their family's needs,[13, 14] with the aim of lowering parental stress and maximizing their  
100 adaptation, as well as improving the infant's development,[14]. DC has proven to be effective in promoting  
101 mental and psychomotor development,[15], neurobehavior, and oral feeding,[16]; reducing NICU length of  
102 stay,[16], and lowering parental stress and anxiety,[17]. Thus, it appears important to scope the DC  
103 literature to identify specific interventions neonatal nurses can implement daily in their practice in order to  
104 optimize preterm infants' and families' outcomes.

105 However, it is unclear which specific interventions DC encompasses. Different authors have suggested  
106 groupings of DC interventions, which have been referred to as a DC model,[18], practice guidelines,[12], a  
107 conceptual model,[19], and core measures,[20]. For example, in their DC model, Altimier and Phillips,[18]  
108 suggest there are seven neuroprotective DC core measures including: the healing environment (physical,  
109 sensory, smell/test, sound/noise, light), partnering with families, positioning and handling the infant,  
110 safeguarding sleep, minimizing stress and pain, protecting skin and optimizing nutrition. The Neonatal  
111 Association of Neonatal Nurses' practice guidelines,[12] and Coughlin, Gibbins et al.,[20] both suggest five  
112 core measures, such as: protected sleep, assessment & management of stress and pain, developmentally  
113 supportive activities of daily living, family-centered care and creating a healing environment. Finally,  
114 Gibbins, Hoath et al.,[19] in their universe of DC conceptual model suggest that DC interventions fit into 12  
115 categories: monitoring/assessing, feeding, positioning, infection control, safety, comfort, thermoregulation,  
116 skin care, respiratory care, family, staff and environment. Still, it remains ambiguous which specific nursing  
117 interventions fit into those global categories. For example, Jebreili, Neshat et al.,[21] evaluated the  
118 effectiveness of an olfactive stimulation intervention to manage procedural pain of preterm infants in the  
119 NICU. Although this intervention aims at reducing the preterm infant's pain, the authors do not identify it as  
120 a DC intervention, nor does it appear in any of the aforementioned groupings. To develop categories of DC



1  
2  
3 121 interventions that are comprehensive, and inclusive we propose that DC interventions fall into eight  
4 122 categories. Our classification encompasses all categories suggested by the various abovementioned  
5 123 authors: family-centered care, feeding, positioning and handling, reduction and management of pain,  
6 124 sensory control, sensory stimulation, skin and routine care and sleep protection.

9  
10 125 DC interventions are primarily delivered by neonatal nurses,[14]. Indeed, by virtue of their field of practice,  
11 126 their professional skills and their unique proximity in the healthcare experience of preterm infants and their  
12 127 families, neonatal nurses are strategically positioned to implement DC interventions in the NICU,[14, 22].  
13 128 However, the visibility of their specific contribution is compromised by the absence of indicators that would  
14 129 allow us to better understand the effects and benefits of DC nursing interventions in the NICU. From a  
15 130 global perspective, the invisibility of the contribution of neonatal nursing to infants' health is a major concern,  
16 131 because it does not allow to distinguish their distinctive and exclusive role in NICU clinical practice,[23]  
17 132 along with how their involvement may favorably influence infants' health outcomes. In the past years,  
18 133 several initiatives to identify quality indicators to assess the contribution of nurses have emerged,[24-26].  
19 134 Although these authors have identified nursing-sensitive quality indicators, the former remain generic and  
20 135 some of these indicators, such as falls and incontinence, are not transferable to a neonatal population.  
21 136 Consequently, the range of implemented DC interventions remains unknown and the absence of specific  
22 137 nursing quality indicators related to these neonatal DC prevents the evaluation of nursing contribution to  
23 138 preterm infants' and families' well-being. A database of quality indicators for neonatology was developed  
24 139 by The Canadian Neonatal Network,[27]. However, the authors of this report did not specifically take into  
25 140 account quality indicators that are specific to neonatal nursing DC interventions but rather observed medical  
26 141 outcomes such as sepsis, survival rates and cardiovascular complications rates. Moreover, 11 nursing-  
27 142 sensitive quality indicators for the NICU were developed in a study by Chen, Huang et al.,[28] but then  
28 143 again, these indicators are general to NICU care (i.e. rate of compliance to proper hand washing, rate of  
29 144 nosocomial infections, etc.) and not specifically related to DC nursing interventions.

30  
31  
32  
33  
34  
35  
36  
37  
38  
39 145 A preliminary search of PROSPERO, MEDLINE, the Cochrane Database of Systematic Reviews and the  
40 146 *Joanna Briggs Institute Database of Systematic Reviews and Implementation Reports* was conducted.  
41 147 Some systematic reviews have looked at the effectiveness of specific DC programs, such as the Newborn  
42 148 Individualized Developmental Care and Assessment Program [NIDCAP],[15], or the effectiveness of  
43 149 interventions on preterm infant's development or health outcomes,[16, 29-31]. To our knowledge, no current  
44 150 reviews scoping the literature on DC nursing interventions have been published or is underway.

45  
46  
47  
48  
49 151 Based on this lack of evidence, the primary objective for this scoping review is to: 1) identify the nature,  
50 152 range and extent of the literature regarding DC nursing interventions for preterm infants in the NICU. The  
51 153 secondary objectives are twofold: 2) highlight specific nursing interventions that fall into our eight identified  
52 154 categories of DC interventions; and 3) suggest indicators sensitive to neonatal nursing related to DC  
53 155 interventions.

## 156 REVIEW QUESTIONS

157 The primary question guiding this scoping review is the following: What is the nature, range and the extent  
158 of the literature regarding DC nursing interventions for preterm infants and families in the NICU?

159 The secondary questions addressed in this scoping review are: What are the specific nursing interventions  
160 that have been associated with our eight nursing DC categories in the NICU? What are the indicators  
161 related to neonatal nursing DC interventions in the NICU?

## 162 METHODS

163 The proposed scoping review will be conducted in accordance with The Joanna Briggs Institute (JBI)  
164 methodology for scoping reviews,[32]. Moreover, as suggested by The JBI, this protocol is based upon the  
165 Preferred Reporting Items for Systematic reviews and Meta-Analyses extension for Scoping Reviews  
166 [PRISMA-ScR] Checklist (see Supplemental file 1),[33].

### 167 Inclusion criteria

#### 168 Participants

169 We will consider studies that included preterm infants or their parents. For this review, we will consider the  
170 definition suggested by the World Health Organization stating that preterm infants are infants born before  
171 the 37<sup>th</sup> week of gestation is completed,[34].

#### 172 Concept

173 We will consider studies that relate to one or many nursing interventions and that fit in one or more of our  
174 identified categories of DC. For this review, as stated before, we established eight categories of DC nursing  
175 interventions that encompass all major categories that are suggested in other DC models,[12, 18-20] and  
176 that are related to nursing care. Those eight categories are (see Table 1): sensory control, sensory  
177 stimulation, family-centered care, positioning and handling, sleep protection, comfort, skin and routine care,  
178 and feeding. In other words, any paper that discusses or is related to one or more specific nursing  
179 interventions that fall into one of these eight categories will be included in this scoping review. Also, a DC  
180 intervention will be qualified as a nursing intervention if it is delivered by nurses or if the intervention could  
181 be delivered by nurses as per their field of practice. We will also consider interventions if they are delivered  
182 by parents themselves. For example, a study evaluating a massage intervention (sensory stimulation)  
183 delivered by nurses would be eligible for inclusion in this review. On the other hand, a study evaluating the  
184 effects of specific macro or micronutrients (feeding) would be excluded because it would be qualified as a  
185 medical intervention.

### 186 Table 1. DC categories according to different conceptual models and clinical guidelines as well as

## 187 categories for this review

| Neuroprotective Core Measures,[18]                                                                                                                                                                                                                                        | Core measures for DC,[12, 20]                                                                                                                                                               | Universe of DC,[19]                                                                                                                                                                                                                                                                                                       | Our categories of DC nursing interventions for this review                                                                                                                                                                             |
|---------------------------------------------------------------------------------------------------------------------------------------------------------------------------------------------------------------------------------------------------------------------------|---------------------------------------------------------------------------------------------------------------------------------------------------------------------------------------------|---------------------------------------------------------------------------------------------------------------------------------------------------------------------------------------------------------------------------------------------------------------------------------------------------------------------------|----------------------------------------------------------------------------------------------------------------------------------------------------------------------------------------------------------------------------------------|
| <b>Healing environment</b> <ul style="list-style-type: none"> <li>- Space;</li> <li>- Privacy;</li> <li>- Safety;</li> <li>- Temperature;</li> <li>- Touch;</li> <li>- Proprioception;</li> <li>- Smell;</li> <li>- Taste;</li> <li>- Sound;</li> <li>- Light.</li> </ul> | <b>Healing environment</b> <ul style="list-style-type: none"> <li>- Light and noise;</li> <li>- Healthcare workers collaboration.</li> </ul>                                                | <b>Environment</b> <ul style="list-style-type: none"> <li>- Light levels;</li> <li>- Noise levels;</li> <li>- Cultural, racial, religious sensitivity;</li> <li>- Leadership.</li> </ul>                                                                                                                                  | <b>Sensory control</b><br>Nursing interventions controlling the preterm infant's sensory environment, that is reducing detrimental sensory stimulation.                                                                                |
| <b>Partnering with families</b>                                                                                                                                                                                                                                           | <b>Family centered care</b>                                                                                                                                                                 | <b>Family</b> <ul style="list-style-type: none"> <li>- Satisfaction;</li> <li>- Involvement</li> <li>- Knowledge;</li> <li>- Autonomy.</li> </ul>                                                                                                                                                                         | <b>Family centered care</b><br>Nursing interventions involving parents and families in their preterm infant's care plan and delivery.                                                                                                  |
| <b>Positioning and handling</b>                                                                                                                                                                                                                                           | <b>Developmentally supportive activities of daily living</b> <ul style="list-style-type: none"> <li>- Positioning;</li> <li>- Feeding;</li> <li>- Maintaining skin integrity.</li> </ul>    | <b>Positioning</b>                                                                                                                                                                                                                                                                                                        | <b>Positioning and Handling</b><br>Nursing interventions that aim to : (1) position the preterm infant appropriately in the NICU incubator or crib, during skin-to-skin or care delivery; (2) handle the preterm infant appropriately. |
| <b>Safeguarding sleep</b>                                                                                                                                                                                                                                                 | <b>Protected sleep</b> <ul style="list-style-type: none"> <li>- Sleep/wake-based care</li> <li>- Care that supports sleeping (swaddling, skin-to-skin);</li> <li>- Sleep safety.</li> </ul> | <b>Comfort</b> <ul style="list-style-type: none"> <li>- Pain assessment and management;</li> <li>- Skin-to-skin;</li> <li>- Massage;</li> <li>- Sleep regulation.</li> </ul>                                                                                                                                              | <b>Sleep protection</b><br>Considering infant's sleep-wake cycle when providing care and promoting continuous and undisturbed sleep.                                                                                                   |
| <b>Minimizing stress and pain</b>                                                                                                                                                                                                                                         | <b>Assessment and management of stress and pain</b>                                                                                                                                         |                                                                                                                                                                                                                                                                                                                           | <b>Reduction and management of pain</b><br>Nursing interventions reducing, eliminating and/or managing procedural or prolonged pain.                                                                                                   |
| <b>Protecting skin</b>                                                                                                                                                                                                                                                    |                                                                                                                                                                                             | <b>Skin care</b>                                                                                                                                                                                                                                                                                                          | <b>Skin and routine care</b><br>Nursing interventions targeting care of the preterm infant's skin and hygiene care.                                                                                                                    |
| <b>Optimizing nutrition</b>                                                                                                                                                                                                                                               |                                                                                                                                                                                             | <b>Feeding</b> <ul style="list-style-type: none"> <li>- Early feeds (trophic, donor milk);</li> <li>- Cue-based feeding;</li> <li>- Nonnutritive sucking.</li> </ul>                                                                                                                                                      | <b>Feeding</b><br>Nursing interventions optimizing directly or indirectly (i.e. interventions preventing oral aversion) oral human milk feeding of the preterm infant.                                                                 |
| --                                                                                                                                                                                                                                                                        | --                                                                                                                                                                                          | <b>Others</b> <ul style="list-style-type: none"> <li>- <b>Thermoregulation</b> (room temperature, swaddling, clothing, bedding, etc.);</li> <li>- <b>Head-to-toe Monitoring/Assessing;</b></li> <li>- <b>Infection control;</b></li> <li>- <b>Patient Safety measures;</b></li> <li>- <b>Respiratory care.</b></li> </ul> | --                                                                                                                                                                                                                                     |

188

189 As for outcomes, all outcomes measured during the NICU hospitalization will be considered for the inclusion  
190 of papers in the review. Papers that do not report any outcome but discuss DC nursing interventions will  
191 also be considered for inclusion.

## 192 Context

193 We will consider papers that discuss DC nursing interventions for preterm infants and their families during  
194 the NICU hospitalization only, that being before the infant is discharged home or transferred to another care  
195 unit.

## 196 Types of sources

197 In this scoping review we will consider quantitative, qualitative and mixed methods study designs for  
198 inclusion. In addition, literature reviews, text and opinion papers, practice guidelines and theoretical papers  
199 will be considered. Articles published in French or English will be included. Articles published from CINAHL,  
200 MEDLINE, Embase, PubMed, Web of Science, Scopus, ProQuest and PsychInfo databases from 2009 to  
201 the present will be included as modern DC interventions have mostly evolved in the past ten years.

## 202 Search strategy

203 The search strategy will aim to locate both published and unpublished primary studies, reviews and opinion  
204 papers pertaining to DC nursing interventions in the NICU. An initial search strategy was developed and  
205 piloted with a librarian, based on MESH databases. A full search strategy for CINAHL, MEDLINE, Embase,  
206 PubMed, Web of Science, Scopus, ProQuest and PsychInfo (see Table S1 - Supplemental file 2) was then  
207 proposed. Key concepts include neonatology, DC and nursing. The search strategy will be restricted to the  
208 last 10 years (2009-2019) due to the rise in publication in DC in the recent years. The search strategy,  
209 including all identified keywords and index terms will be adapted for each included information source.

## 210 Information sources

211 In addition to the proposed databases (CINAHL, MEDLINE, Embase, PubMed, Web of Science, Scopus,  
212 ProQuest and PsychInfo), several gray literature sources will be hand-searched, including Google Scholar,  
213 the Grey Guide and clinical trial registries (clinicaltrial.gov, clinicaltrialregister.eu, isrctn.com, anzctr.org.au).  
214 References lists will also be analysed when appropriate to identify additional papers. Finally, a monthly  
215 bibliographic watch on DC prepared by our center's librarian  
216 (<https://soinsdudeveloppement.wordpress.com/>) will be reviewed and analysed for potential papers.  
217 Furthermore, authors with incomplete records will be contacted as needed to obtain supplemental  
218 information.

## 219 **Study selection**

220 Following the search, all identified records will be collated and uploaded into Covidence systematic review  
221 software v1528 (Veritas Health Innovation, Melbourne, Australia; [www.covidence.org](http://www.covidence.org)) and duplicates  
222 removed. Seven review authors (MH, MA, AL, GDF, GL, AB, NF), in teams of two, will then screen titles  
223 and abstracts against the inclusion criteria as a means to pilot the specificity of inclusion criteria. Each  
224 reviewer will screen 250 articles to assess the criteria's performance and the team will further refine them  
225 accordingly. Criteria will be piloted again until performance is deemed adequate by all reviewers. Initial  
226 screening will be completed by one independent reviewer. Potentially relevant papers will be retrieved in  
227 full and their citation details imported into Covidence. The full text of selected citations will be assessed in  
228 detail against the inclusion criteria by the same seven review authors, in teams of two independently. Similar  
229 to the initial screening, inclusion criteria will be piloted and further refined before completing the full-text  
230 selection process. Reasons for exclusion of full text papers that do not meet the inclusion criteria will be  
231 recorded and reported in the scoping review. Any disagreements that arise between the reviewers at each  
232 stage of the selection process will be resolved with a third review author. The results of the search will be  
233 reported in full in the final scoping review and presented in a Preferred Reporting Items for Systematic  
234 Reviews and Meta-analyses [PRISMA] flow diagram,[35].

## 235 **Data extraction**

236 Data will be extracted from papers included in the scoping review by two independent reviewers using a  
237 data extraction tool developed by the review authors. Any disagreements that arise between the reviewers  
238 will be resolved through discussion, or with a third reviewer. The draft data extraction tool will be modified  
239 and revised as necessary during the pilot phase of extracting data from the first 20 included paper. Authors  
240 of papers will be contacted to request missing or additional data, where required. Modifications, if needed,  
241 will be detailed in the full scoping review.

## 242 **Data items**

243 To answer to our first two review questions, those being to describe the nature, range and extent of the  
244 literature as well as specific DC nursing interventions, the data extracted will include:

- 245 1. Descriptive data: authors, year of publication, country of origin, type of article and aim.
- 246 2. Methodological data: study design (if applicable), population (e.g. gestational age of the preterm infants  
247 at birth, inclusion or not of parents).
- 248 3. Data about the specific DC nursing intervention: category of DC intervention to which it pertains  
249 according to our proposed classification, details about the intervention as per the Description and  
250 Replication checklist [TIDieR],[36] when applicable – the intervention, the materials, the procedures,  
251 the provider(s), the modes of delivery, where, when and how much (frequency, duration and dose) as

252 well as possibilities for tailoring the intervention.

253 A second data extraction process will be conducted to answer to our third review question, that is to highlight  
254 indicators sensitive to nursing DC interventions. Thus, in order to identify nursing sensitive indicators, we  
255 will extract the following data only for papers with an experimental design:

256 4. Outcome data: outcomes measured, timing of outcome measure and reported results.

## 257 **Critical appraisal and secondary data synthesis**

258 Critical appraisal of included papers is not mandatory according to the scoping review JBI methodology,[32].  
259 Nevertheless, as per our third review question, we will critically appraise all studies with an experimental  
260 design using the Joanna Briggs Institute Checklist for Randomized Controlled Trials,[37]. Two independent  
261 review authors will complete the checklist for each experimental study and disagreements will be resolved  
262 by a third review author.

263 A secondary qualitative data synthesis of the outcomes reported in experimental studies will be conducted  
264 in order to highlight indicators sensitive to neonatal nursing DC interventions in the NICU. Provisional  
265 indicators will be shared with experts with a clinical or academic background in the field of quality of care  
266 and neonatology so they can provide guidance and ultimately validation. Detailed methodology that pertains  
267 to the third objective will be reported in the results paper.

## 268 **Data presentation**

269 Our primary and first secondary objective are to describe the extent, range and nature of the literature  
270 related to DC nursing interventions as well as the specific nursing interventions that relate to DC. The  
271 extracted data will be presented in tabular form. A narrative summary will accompany the tabulated results  
272 and will describe how the results relate to the reviews objectives and questions. As per our other secondary  
273 objective to highlight indicators related to DC nursing interventions, data will be presented narratively.

## 274 **ETHICS AND DISSEMINATION**

275 As this is a literature review project using already collected and published data, it will not be necessary to  
276 seek ethical approval from an Institutional Review Board. Results of this scoping review will be presented  
277 in scientific meetings and published in refereed papers. Our three objectives will be reported in three results  
278 papers.

## 279 **PATIENT AND PUBLIC INVOLVMENT**

280 Patients and members of the public were not involved in the development of this protocol.

## 281 **ACKNOWLEDGMENTS**

282 We would like to acknowledge the contribution of Valérie Lebel and Assia Mourid for the search strategy.

## 283 **FUNDING**

284 This scoping review is funded by the Quebec Network on Nursing Interventions/*Réseau de recherche en*  
285 *interventions en sciences infirmières du Québec* [RRISIQ]. Funders are not involved in any form in the  
286 review process.

## 287 **COMPETING INTERESTS**

288 The authors declare no conflict of interest.

## 289 **DATA AVAILABILITY STATEMENT**

290 No data are available as this is a systematic scoping review protocol.

## 291 **PATIENT AND PUBLIC INVOLVEMENT**

292 Patients or members of the public were not involved in the development of this protocol.

## 293 **AUTHOR CONTRIBUTIONS**

294 MH (PI) drafted the first version of the review protocol revised by MA and NF (Co-Is) to obtain funding from  
295 RRISIQ. AL wrote the first version of this manuscript with the contribution of MH, MA, GL, GD, and NF. All  
296 authors read and approved the final version. MH, GL and AB drafted the initial search strategy.

## 297 **REFERENCES**

- 298  
299 1. McBryde, M., et al., *Academic Outcomes of School-Aged Children Born Preterm: A Systematic*  
300 *Review and Meta-analysis*. JAMA Netw Open, 2020. **3**(4): p. e202027.
- 301 2. O'Reilly, H., et al., *Neuropsychological Outcomes at 19 Years of Age Following Extremely*  
302 *Preterm Birth*. Pediatrics, 2020. **145**(2).
- 303 3. Pyhala, R., et al., *Self-Reported Mental Health Problems Among Adults Born Preterm: A Meta-*  
304 *analysis*. Pediatrics, 2017. **139**(4).

- 1  
2  
3 305 4. Wolke, D., et al., *Universal gestational age effects on cognitive and basic mathematic processing: 2 cohorts in 2 countries*. J Pediatr, 2015. **166**(6): p. 1410-6 e1-2.
- 4 306
- 5 307 5. Treyvaud, K., et al., *Psychiatric outcomes at age seven for very preterm children: rates and 7 308 predictors*. J Child Psychol Psychiatry, 2013. **54**(7): p. 772-9.
- 6 309 6. Breeman, L.D., et al., *Preterm Cognitive Function Into Adulthood*. Pediatrics, 2015. **136**(3): p. 10 310 415-23.
- 11 311 7. Eryigit-Madzwamuse, S., et al., *Personality of adults who were born very preterm*. Arch Dis Child 12 312 Fetal Neonatal Ed, 2015. **100**(6): p. F524-9.
- 13 313 8. Lavallée, A., et al., *Part 1: Narrative overview of developmental care interventions for the preterm 14 314 newborn*. Journal of Neonatal Nursing, 2019. **25**(1): p. 3-8.
- 15 315 9. Volpe, J.J., *Brain injury in premature infants: a complex amalgam of destructive and 17 316 developmental disturbances*. Lancet Neurol, 2009. **8**(1): p. 110-24.
- 18 317 10. Als, H., *Toward a Synactive Theory of Development: Promise for the Assessment and Support of 20 318 Infant individuality*. Infant Mental Health Journal, 1982. **3**(4): p. 229-243.
- 21 319 11. Als, H., *Developmental care in the newborn intensive care unit*. Current Opinion in Pediatrics, 22 320 1998. **10**(2): p. 138-142.
- 23 321 12. Kenner, C. and J.M. McGrath, *Developmental Care of Newborns and Infants*. 2 ed. 2010, Illinois: 24 322 National Association of Neonatal Nurses.
- 25 323 13. Aita, M. and L. Snider, *The art of developmental care in the NICU : a concept analysis*. Journal of 26 324 Advanced Nursing, 2003. **41**(3): p. 223-232.
- 27 325 14. Macho, P., *Individualized Developmental Care in the NICU: A Concept Analysis*. Adv Neonatal 28 326 Care, 2017. **17**(3): p. 162-174.
- 29 327 15. Ohlsson, A. and S.E. Jacobs, *NIDCAP: a systematic review and meta-analyses of randomized 30 328 controlled trials*. Pediatrics, 2013. **131**(3): p. e881-93.
- 31 329 16. Symington, A. and J. Pinelli, *Developmental care for promoting development and preventing 32 330 morbidity in preterm infants*. Cochrane Database Syst Rev, 2009(2): p. CD001814.
- 33 331 17. Ding, X., et al., *Effects of family-centred care interventions on preterm infants and parents in 34 332 neonatal intensive care units: A systematic review and meta-analysis of randomised controlled 35 333 trials*. Aust Crit Care, 2019. **32**(1): p. 63-75.
- 36 334 18. Altimier, L. and R.M. Phillips, *The Neonatal Integrative Developmental Care Model: Seven 37 335 Neuroprotective Core Measures for Family-Centered Developmental Care*. Newborn and Infant 38 336 Nursing Reviews, 2013. **13**(1): p. 9-22.
- 39 337 19. Gibbins, S., et al., *The universe of developmental care: a new conceptual model for application in 40 338 the neonatal intensive care unit*. Adv Neonatal Care, 2008. **8**(3): p. 141-7.
- 41 339 20. Coughlin, M., S. Gibbins, and S. Hoath, *Core measures for developmentally supportive care in 42 340 neonatal intensive care units: theory, precedence and practice*. J Adv Nurs, 2009. **65**(10): p. 43 341 2239-48.
- 44  
45  
46  
47  
48  
49  
50  
51  
52  
53  
54  
55  
56  
57  
58  
59  
60



- 1  
2  
3 342 21. Jebreili, M., et al., *Comparison of Breastmilk Odor and Vanilla Odor on Mitigating Premature*  
4 343 *Infants' Response to Pain During and After Venipuncture*. *Breastfeed Med*, 2015. **10**(7): p. 362-5.  
5  
6 344 22. Lavallée, A., et al., *PART 2: Practice and research recommendations for quality developmental*  
7 345 *care in the NICU*. *Journal of Neonatal Nursing*, 2019.  
8  
9 346 23. Eklund, W. and C. Kenner, *Council of International Neonatal Nurses (COINN) Global Neonatal*  
10 347 *Provider Database Initiative (CGNPD): Results From an Implementation Focus Group*. *Adv*  
11 348 *Neonatal Care*, 2015. **15**(6): p. 407-15.  
12  
13 349 24. American Nurses Association, *The national database of nursing quality indicators*. 1998.  
14  
15 350 25. Dubois, C.A., et al., *Indicateurs prioritaires pour évaluer la contribution infirmière à la qualité des*  
16 351 *soins*. 2015: SIDIIIEF.  
17  
18 352 26. National Quality Forum, *National Voluntary Consensus Standards for Nursing-Sensitive Care: An*  
19 353 *Initial Performance Measure Set*. 2004.  
20  
21 354 27. The Canadian Neonatal Network. *Annual Report*. 2013; Available from:  
22 355 <https://www.canadianneonatalnetwork.org/Portal/LinkClick.aspx?fileticket=IreR0871sjA%3D&tabid=39>.  
23 356  
24  
25 357 28. Chen, L., et al., *Using the Delphi method to develop nursing-sensitive quality indicators for the*  
26 358 *NICU*. *J Clin Nurs*, 2017. **26**(3-4): p. 502-513.  
27  
28 359 29. Legendre, V., et al., *The evolving practice of developmental care in the neonatal unit: a*  
29 360 *systematic review*. *Phys Occup Ther Pediatr*, 2011. **31**(3): p. 315-38.  
30  
31 361 30. Burke, S., *Systematic review of developmental care interventions in the neonatal intensive care*  
32 362 *unit since 2006*. *J Child Health Care*, 2018. **22**(2): p. 269-286.  
33  
34 363 31. Soleimani, F., et al., *Do NICU developmental care improve cognitive and motor outcomes for*  
35 364 *preterm infants? A systematic review and meta-analysis*. *BMC Pediatr*, 2020. **20**(1): p. 67.  
36  
37 365 32. Peters, M.D.J., et al., *Scoping Reviews*, in *Joanna Briggs Institute Reviewer's Manual*, E.  
38 366 Aromataris and Z. Munn, Editors. 2020.  
39  
40 367 33. Tricco, A.C., et al., *PRISMA Extension for Scoping Reviews (PRISMA-ScR): Checklist and*  
41 368 *Explanation*. *Ann Intern Med*, 2018. **169**(7): p. 467-473.  
42  
43 369 34. World Health Organization. *Preterm birth*. 2020; Available from: [https://www.who.int/news-](https://www.who.int/news-room/fact-sheets/detail/preterm-birth#:~:text=Preterm%20is%20defined%20as%20babies,preterm%20(28%20to%2032%20weeks))  
44 370 [room/fact-sheets/detail/preterm-](https://www.who.int/news-room/fact-sheets/detail/preterm-birth#:~:text=Preterm%20is%20defined%20as%20babies,preterm%20(28%20to%2032%20weeks))  
45 371 [birth#:~:text=Preterm%20is%20defined%20as%20babies,preterm%20\(28%20to%2032%20week](https://www.who.int/news-room/fact-sheets/detail/preterm-birth#:~:text=Preterm%20is%20defined%20as%20babies,preterm%20(28%20to%2032%20weeks))  
46 372 [s\)](https://www.who.int/news-room/fact-sheets/detail/preterm-birth#:~:text=Preterm%20is%20defined%20as%20babies,preterm%20(28%20to%2032%20weeks)).  
47  
48 373 35. Moher, D., et al., *Preferred reporting items for systematic reviews and meta-analyses: the*  
49 374 *PRISMA statement*. *J Clin Epidemiol*, 2009. **62**(10): p. 1006-12.  
50  
51 375 36. Hoffmann, T.C., et al., *Better reporting of interventions: template for intervention description and*  
52 376 *replication (TIDieR) checklist and guide*. *BMJ*, 2014. **348**: p. g1687.  
53  
54 377 37. Joanna Briggs Institute *Checklist for Randomized Controlled Trials*. 2017.  
55  
56 378

## Preferred Reporting Items for Systematic reviews and Meta-Analyses extension for Scoping Reviews (PRISMA-ScR) Checklist

| SECTION                                               | ITEM | PRISMA-ScR CHECKLIST ITEM                                                                                                                                                                                                                                                                                  | REPORTED ON PAGE # |
|-------------------------------------------------------|------|------------------------------------------------------------------------------------------------------------------------------------------------------------------------------------------------------------------------------------------------------------------------------------------------------------|--------------------|
| <b>TITLE</b>                                          |      |                                                                                                                                                                                                                                                                                                            |                    |
| Title                                                 | 1    | Identify the report as a scoping review.                                                                                                                                                                                                                                                                   |                    |
| <b>ABSTRACT</b>                                       |      |                                                                                                                                                                                                                                                                                                            |                    |
| Structured summary                                    | 2    | Provide a structured summary that includes (as applicable): background, objectives, eligibility criteria, sources of evidence, charting methods, results, and conclusions that relate to the review questions and objectives.                                                                              |                    |
| <b>INTRODUCTION</b>                                   |      |                                                                                                                                                                                                                                                                                                            |                    |
| Rationale                                             | 3    | Describe the rationale for the review in the context of what is already known. Explain why the review questions/objectives lend themselves to a scoping review approach.                                                                                                                                   |                    |
| Objectives                                            | 4    | Provide an explicit statement of the questions and objectives being addressed with reference to their key elements (e.g., population or participants, concepts, and context) or other relevant key elements used to conceptualize the review questions and/or objectives.                                  |                    |
| <b>METHODS</b>                                        |      |                                                                                                                                                                                                                                                                                                            |                    |
| Protocol and registration                             | 5    | Indicate whether a review protocol exists; state if and where it can be accessed (e.g., a Web address); and if available, provide registration information, including the registration number.                                                                                                             |                    |
| Eligibility criteria                                  | 6    | Specify characteristics of the sources of evidence used as eligibility criteria (e.g., years considered, language, and publication status), and provide a rationale.                                                                                                                                       |                    |
| Information sources*                                  | 7    | Describe all information sources in the search (e.g., databases with dates of coverage and contact with authors to identify additional sources), as well as the date the most recent search was executed.                                                                                                  |                    |
| Search                                                | 8    | Present the full electronic search strategy for at least 1 database, including any limits used, such that it could be repeated.                                                                                                                                                                            |                    |
| Selection of sources of evidence†                     | 9    | State the process for selecting sources of evidence (i.e., screening and eligibility) included in the scoping review.                                                                                                                                                                                      |                    |
| Data charting process‡                                | 10   | Describe the methods of charting data from the included sources of evidence (e.g., calibrated forms or forms that have been tested by the team before their use, and whether data charting was done independently or in duplicate) and any processes for obtaining and confirming data from investigators. |                    |
| Data items                                            | 11   | List and define all variables for which data were sought and any assumptions and simplifications made.                                                                                                                                                                                                     |                    |
| Critical appraisal of individual sources of evidence§ | 12   | If done, provide a rationale for conducting a critical appraisal of included sources of evidence; describe the methods used and how this information was used in any data synthesis (if appropriate).                                                                                                      |                    |
| Synthesis of results                                  | 13   | Describe the methods of handling and summarizing the data that were charted.                                                                                                                                                                                                                               |                    |

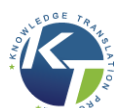

| SECTION                                       | ITEM | PRISMA-ScR CHECKLIST ITEM                                                                                                                                                                       | REPORTED ON PAGE # |
|-----------------------------------------------|------|-------------------------------------------------------------------------------------------------------------------------------------------------------------------------------------------------|--------------------|
| <b>RESULTS</b>                                |      |                                                                                                                                                                                                 |                    |
| Selection of sources of evidence              | 14   | Give numbers of sources of evidence screened, assessed for eligibility, and included in the review, with reasons for exclusions at each stage, ideally using a flow diagram.                    |                    |
| Characteristics of sources of evidence        | 15   | For each source of evidence, present characteristics for which data were charted and provide the citations.                                                                                     |                    |
| Critical appraisal within sources of evidence | 16   | If done, present data on critical appraisal of included sources of evidence (see item 12).                                                                                                      |                    |
| Results of individual sources of evidence     | 17   | For each included source of evidence, present the relevant data that were charted that relate to the review questions and objectives.                                                           |                    |
| Synthesis of results                          | 18   | Summarize and/or present the charting results as they relate to the review questions and objectives.                                                                                            |                    |
| <b>DISCUSSION</b>                             |      |                                                                                                                                                                                                 |                    |
| Summary of evidence                           | 19   | Summarize the main results (including an overview of concepts, themes, and types of evidence available), link to the review questions and objectives, and consider the relevance to key groups. |                    |
| Limitations                                   | 20   | Discuss the limitations of the scoping review process.                                                                                                                                          |                    |
| Conclusions                                   | 21   | Provide a general interpretation of the results with respect to the review questions and objectives, as well as potential implications and/or next steps.                                       |                    |
| <b>FUNDING</b>                                |      |                                                                                                                                                                                                 |                    |
| Funding                                       | 22   | Describe sources of funding for the included sources of evidence, as well as sources of funding for the scoping review. Describe the role of the funders of the scoping review.                 |                    |

JBI = Joanna Briggs Institute; PRISMA-ScR = Preferred Reporting Items for Systematic reviews and Meta-Analyses extension for Scoping Reviews.

\* Where *sources of evidence* (see second footnote) are compiled from, such as bibliographic databases, social media platforms, and Web sites.

† A more inclusive/heterogeneous term used to account for the different types of evidence or data sources (e.g., quantitative and/or qualitative research, expert opinion, and policy documents) that may be eligible in a scoping review as opposed to only studies. This is not to be confused with *information sources* (see first footnote).

‡ The frameworks by Arksey and O'Malley (6) and Levac and colleagues (7) and the JBI guidance (4, 5) refer to the process of data extraction in a scoping review as data charting.

§ The process of systematically examining research evidence to assess its validity, results, and relevance before using it to inform a decision. This term is used for items 12 and 19 instead of "risk of bias" (which is more applicable to systematic reviews of interventions) to include and acknowledge the various sources of evidence that may be used in a scoping review (e.g., quantitative and/or qualitative research, expert opinion, and policy document).

From: Tricco AC, Lillie E, Zarin W, O'Brien KK, Colquhoun H, Levac D, et al. PRISMA Extension for Scoping Reviews (PRISMA-ScR): Checklist and Explanation. *Ann Intern Med.* 2018;169:467–473. doi: [10.7326/M18-0850](https://doi.org/10.7326/M18-0850).

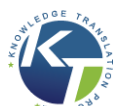

## SUPPLEMENTAL FILE 2: EXAMPLE OF OUR SEARCH STRATEGY

**Table S1. Search strategy in CINAHL**

| Search                    | CINAHL (octobre, 2019)                                                                                                                                                                                                                                                                                                                                                                                                                                                                                                                                                                                                                                                                                                                     | Records retrieved |
|---------------------------|--------------------------------------------------------------------------------------------------------------------------------------------------------------------------------------------------------------------------------------------------------------------------------------------------------------------------------------------------------------------------------------------------------------------------------------------------------------------------------------------------------------------------------------------------------------------------------------------------------------------------------------------------------------------------------------------------------------------------------------------|-------------------|
| #1 Subject heading search | (MH "Evaluation and Quality Improvement Program") OR (MH "Magnet Hospital Accreditation") OR (MH "Joint Commission") OR (MH "Quality Patient Care Scale") OR (MH "Nursing Practice, Evidence-Based+") OR (MH "Nursing Assessment") OR (MH "Health Care Delivery") OR (MH "Health Care Delivery, Integrated") OR (MH "Health Resource Allocation") OR (MH "Health Resource Utilization") OR (MH "Accountable Care Organizations") OR (MH "Health Care Reform") OR (MH "Health Services Accessibility") OR (MH "Program Evaluation") OR (MH "Quality of Care Research") OR (MH "Performance Measurement Systems") OR (MH "Health Status Indicators") OR (MH "Clinical Assessment Tools") OR (MH "Quality of Health Care+")                   | 958,800           |
| #2 Subject heading search | (MH "Intensive Care Units, Neonatal") OR (MH "Neonatal Assessment+") OR (MH "Neonatal Intensive Care Nursing") OR (MH "Intensive Care, Neonatal") OR (MH "Neonatal Nurse Practitioners") OR (MH "Neonatal Nursing") OR (MH "Infant, Low Birth Weight+") OR (MH "Infant, Premature") OR (MH "Infant, Hospitalized") OR (MH "Infant, High Risk") OR (MH "Infant, Drug-Exposed")                                                                                                                                                                                                                                                                                                                                                              | 47,945            |
| #3 Subject heading search | Nurs*                                                                                                                                                                                                                                                                                                                                                                                                                                                                                                                                                                                                                                                                                                                                      | 173,295           |
| #4 keyword search         | TI( Indicator* OR quality OR performance OR outcome* OR metrics OR standard* OR (evidence* N2 practice) OR benchmarking OR "report card*" OR "EBP" OR (Evidence* N2 nursing) OR "EBN" OR "practice guidelines" OR (program* N3 evaluati* ) OR AB ( Indicator* OR quality OR performance OR outcome* OR metrics OR standard* OR (evidence* N2 practice) OR benchmarking OR "report card*" OR "EBP" OR (Evidence* N2 nursing) OR "EBN" OR "practice guidelines" OR (program* N3 evaluati* ) OR MW ( Indicator* OR quality OR performance OR outcome* OR metrics OR standard* OR (evidence* N2 practice) OR benchmarking OR "report card*" OR "EBP" OR (Evidence* N2 nursing) OR "EBN" OR "practice guidelines" OR (program* N3 evaluati* ) ) | 1,665,707         |
| #5 keyword search         | TI ( ((preterm OR "pre-term" OR premature OR (low* N2 Weight) OR small*) AND (newborn* OR infant* OR bab* OR child*)) OR Neonat* ) OR AB ( ((preterm OR "pre-term" OR premature OR (low* N2 Weight) OR small*) AND (newborn* OR infant* OR bab* OR child*)) OR Neonat* ) OR MW ( ((preterm OR "pre-term" OR premature OR (low* N2 Weight) OR small*) AND (newborn* OR infant* OR bab* OR child*)) OR Neonat* )                                                                                                                                                                                                                                                                                                                             | 114,605           |

1  
2  
3  
4  
5  
6  
7  
8  
9  
10  
11  
12  
13  
14  
15  
16  
17  
18  
19  
20  
21  
22  
23  
24  
25  
26  
27  
28  
29  
30  
31  
32  
33  
34  
35  
36  
37  
38  
39  
40  
41  
42  
43  
44  
45  
46  
47  
48  
49  
50  
51  
52  
53  
54  
55  
56  
57  
58  
59  
60

|                                                                                            |                                          |           |
|--------------------------------------------------------------------------------------------|------------------------------------------|-----------|
| #6<br>keyword<br>search                                                                    | TX nurs*                                 | 1,678,740 |
| #4                                                                                         | (#1 AND #2 AND #3) OR (#4 AND #5 AND #6) | 7991      |
| Limited to 2009-current, french and english<br>(DT 2009-current AND LA(english OR french)) |                                          |           |

For peer review only

# BMJ Open

## A comprehensive mapping and nursing-sensitive outcome indicators of developmental care interventions in NICU: A Scoping review protocol

|                                 |                                                                                                                                                                                                                                                                                                                                                                                                                                                                                                                                                                                                                                                                                                                                                                                                                               |
|---------------------------------|-------------------------------------------------------------------------------------------------------------------------------------------------------------------------------------------------------------------------------------------------------------------------------------------------------------------------------------------------------------------------------------------------------------------------------------------------------------------------------------------------------------------------------------------------------------------------------------------------------------------------------------------------------------------------------------------------------------------------------------------------------------------------------------------------------------------------------|
| Journal:                        | <i>BMJ Open</i>                                                                                                                                                                                                                                                                                                                                                                                                                                                                                                                                                                                                                                                                                                                                                                                                               |
| Manuscript ID                   | bmjopen-2020-046807.R1                                                                                                                                                                                                                                                                                                                                                                                                                                                                                                                                                                                                                                                                                                                                                                                                        |
| Article Type:                   | Protocol                                                                                                                                                                                                                                                                                                                                                                                                                                                                                                                                                                                                                                                                                                                                                                                                                      |
| Date Submitted by the Author:   | 02-Jul-2021                                                                                                                                                                                                                                                                                                                                                                                                                                                                                                                                                                                                                                                                                                                                                                                                                   |
| Complete List of Authors:       | Héon , Marjolaine; Université de Montréal, Faculty of Nursing; Réseau de Recherche portant sur les Interventions en Sciences Infirmières du Québec<br>Aïta, Marilyn; Université de Montréal, Faculty of Nursing; CHU Sainte-Justine Centre de Recherche<br>Lavallée, Andréane; Université de Montréal, Faculty of Nursing; Centre Hospitalier Universitaire Sainte-Justine, Research Center<br>De Clifford-Faugère, Gwenaëlle; Université de Montréal, Faculty of Nursing; CHU Sainte-Justine Centre de Recherche<br>Laporte, Geneviève; Université de Montréal, Faculty of Nursing; CHU Sainte-Justine Centre de Recherche<br>Boisvert, Annie; Université de Montréal, Faculty of Nursing; CHU Sainte-Justine, Neonatology<br>Feeley, Nancy; McGill University, School of Nursing; Lady Davis Institute for Medical Research |
| <b>Primary Subject Heading</b>: | Nursing                                                                                                                                                                                                                                                                                                                                                                                                                                                                                                                                                                                                                                                                                                                                                                                                                       |
| Secondary Subject Heading:      | Nursing                                                                                                                                                                                                                                                                                                                                                                                                                                                                                                                                                                                                                                                                                                                                                                                                                       |
| Keywords:                       | NEONATOLOGY, PERINATOLOGY, Neonatal intensive & critical care < INTENSIVE & CRITICAL CARE                                                                                                                                                                                                                                                                                                                                                                                                                                                                                                                                                                                                                                                                                                                                     |
|                                 |                                                                                                                                                                                                                                                                                                                                                                                                                                                                                                                                                                                                                                                                                                                                                                                                                               |

SCHOLARONE™  
Manuscripts



I, the Submitting Author has the right to grant and does grant on behalf of all authors of the Work (as defined in the below author licence), an exclusive licence and/or a non-exclusive licence for contributions from authors who are: i) UK Crown employees; ii) where BMJ has agreed a CC-BY licence shall apply, and/or iii) in accordance with the terms applicable for US Federal Government officers or employees acting as part of their official duties; on a worldwide, perpetual, irrevocable, royalty-free basis to BMJ Publishing Group Ltd ("BMJ") its licensees and where the relevant Journal is co-owned by BMJ to the co-owners of the Journal, to publish the Work in this journal and any other BMJ products and to exploit all rights, as set out in our [licence](#).

The Submitting Author accepts and understands that any supply made under these terms is made by BMJ to the Submitting Author unless you are acting as an employee on behalf of your employer or a postgraduate student of an affiliated institution which is paying any applicable article publishing charge ("APC") for Open Access articles. Where the Submitting Author wishes to make the Work available on an Open Access basis (and intends to pay the relevant APC), the terms of reuse of such Open Access shall be governed by a Creative Commons licence – details of these licences and which [Creative Commons](#) licence will apply to this Work are set out in our licence referred to above.

Other than as permitted in any relevant BMJ Author's Self Archiving Policies, I confirm this Work has not been accepted for publication elsewhere, is not being considered for publication elsewhere and does not duplicate material already published. I confirm all authors consent to publication of this Work and authorise the granting of this licence.

# A comprehensive mapping and nursing-sensitive outcome indicators of developmental care interventions in NICU: A Scoping review protocol

## Marjolaine Héon, RN, Ph.D.<sup>1,2</sup> (corresponding author)

<sup>1</sup>Faculty of Nursing, Université de Montréal, Montreal, Quebec, Canada

<sup>2</sup> Quebec Network on Nursing Intervention Research (RRISIQ), Montreal, Quebec, Canada

Email: [marjolaine.heon@umontreal.ca](mailto:marjolaine.heon@umontreal.ca)

ORCID: <https://orcid.org/0000-0001-7450-1797>

## Marilyn Aita, RN, Ph.D.<sup>1,2,3</sup>

<sup>1</sup>Faculty of Nursing, Université de Montréal, Montreal, Quebec, Canada

<sup>2</sup>CHU Sainte-Justine Research Centre, Montreal, Quebec, Canada

<sup>3</sup> Quebec Network on Nursing Intervention Research (RRISIQ), Montreal, Quebec, Canada

Email: [marilyn.aita@umontreal.ca](mailto:marilyn.aita@umontreal.ca)

ORCID: <https://orcid.org/0000-0002-6197-8796>

## Andréane Lavallée, RN, PhD<sup>1,2</sup>

<sup>1</sup>Faculty of Nursing, Université de Montréal, Montréal, Québec, Canada

<sup>2</sup>CHU Sainte-Justine Research Centre, Montreal, Quebec, Canada

Email : [andreane.lavallee@umontreal.ca](mailto:andreane.lavallee@umontreal.ca)

ORCID : <https://orcid.org/0000-0001-5702-3084>

## Gwenaëlle De Clifford-Faugère, RN, M.Sc., PhD(c)<sup>1,2,4</sup>

<sup>1</sup>Faculty of Nursing, Université de Montréal, Montreal, Quebec, Canada

<sup>2</sup>CHU Sainte-Justine Research Centre, Montreal, Quebec, Canada

<sup>4</sup>Faculté des Sciences Médicales et Paramédicales, Aix Marseille Université, EA3279-CEReSS, Marseille, France

Email: [gwenaelle.de.clifford@umontreal.ca](mailto:gwenaelle.de.clifford@umontreal.ca)

ORCID: <https://orcid.org/0000-0002-9719-5531>

## Geneviève Laporte, RN, PhD(c)<sup>1,2</sup>

<sup>1</sup>Faculty of Nursing, Université de Montréal, Montreal, Quebec, Canada

<sup>2</sup>CHU Sainte-Justine Research Centre, Montreal, Quebec, Canada

Email : [genevieve.laporte.1@umontreal.ca](mailto:genevieve.laporte.1@umontreal.ca)

ORCID : <https://orcid.org/0000-0002-3612-8546>

## Annie Boisvert, RN, Master student<sup>1,2</sup>

<sup>1</sup>Faculty of Nursing, Université de Montréal, Montreal, Quebec, Canada

<sup>2</sup>CHU Sainte-Justine, Montreal, Quebec, Canada



1  
2  
3 40 Email: [annie.boisvert.5@umontreal.ca](mailto:annie.boisvert.5@umontreal.ca)  
4 41

5  
6 42 **Nancy Feeley, RN, PhD** <sup>3,5,6</sup>

7 43 <sup>3</sup> Quebec Network on Nursing Intervention Research (RRISIQ), Montreal, Quebec, Canada

8  
9 44 <sup>5</sup> Ingram School of Nursing, McGill University, Montreal, Quebec, Canada

10 45 <sup>6</sup> Centre for Nursing Research and Lady Davis Institute, Jewish General Hospital, Montreal,  
11 46 Quebec, Canada

12  
13 47 **Email :** [nancy.feeley@mcgill.ca](mailto:nancy.feeley@mcgill.ca)

14 48 **ORCID :** <https://orcid.org/0000-0003-2836-4116>  
15 49

16  
17 50 **Word count** (excluding title page, abstract, references, figures and tables): 2740 words.  
18  
19  
20  
21  
22  
23  
24  
25  
26  
27  
28  
29  
30  
31  
32  
33  
34  
35  
36  
37  
38  
39  
40  
41  
42  
43  
44  
45  
46  
47  
48  
49  
50  
51  
52  
53  
54  
55  
56  
57  
58  
59  
60

## 51 ABSTRACT

52 **Introduction:** Neurodevelopmental outcomes of preterm infant are still a contemporary concern. To  
53 counter the detrimental effects resulting from the hospitalization in the Neonatal Intensive Care Unit (NICU),  
54 Developmental Care (DC) interventions have emerged as a philosophy of care aimed at protecting and  
55 enhancing preterm infant's development and promoting parental outcomes. In the past two decades, many  
56 authors have suggested DC models, core measures, practice guidelines, and standards of care but outlined  
57 different groupings of interventions rather than specific interventions that can be used in NICU clinical  
58 practice. Moreover, as these DC interventions are mostly implemented by neonatal nurses, it would be  
59 strategic and valuable to identify specific outcome indicators to make visible the contribution of NICU nurses  
60 to DC. Objectives: The overarching objective of this review is to identify the nature, range and extent of the  
61 literature regarding DC nursing interventions for preterm infants in the NICU. The secondary twofold  
62 objectives are to highlight interventions that fall into identified categories of DC interventions and suggest  
63 nursing-sensitive outcome indicators related to DC interventions in the NICU. Inclusion criteria: Papers  
64 reporting on or discussing a DC nursing intervention during NICU hospitalization will be included.

65 **Methods and analysis:** The Joanna Briggs Institute's methodology for scoping reviews will be followed.  
66 CINAHL, MEDLINE, Embase, PubMed, Web of Science, Scopus, ProQuest and PsychInfo databases from  
67 2009 to the present will be searched. Any type of paper, published in English or French, will be considered.  
68 Study selection and data extraction will be conducted by pairs of two review authors independently. A  
69 qualitative content analysis will be conducted.

70 **Ethics and dissemination:** No Institutional Review Board ethical approbation is needed. Results of this  
71 review will be presented in scientific meetings and published in refereed papers.

72 **Keywords:** neonatal intensive care unit; developmental care; nursing care; preterm infant; scoping review.

### 73 **STRENGTHS AND LIMITATIONS OF THIS STUDY**

- 74 • First scoping review that aims to identify nursing-sensitive outcome indicators related to  
75 developmental care interventions in the NICU.
- 76 • New comprehensive and inclusive categories of developmental care interventions orient this scoping  
77 review.
- 78 • This scoping review protocol follows the recommendations of the Joanna Briggs Institute for the  
79 conduct of systematic and rigorous reviews.
- 80 • As the scope of this review is large and the literature search strategy is very sensitive, it will include  
81 all relevant literature but might lack specificity.
- 82 • The scope of this review is limited to developmental care interventions delivered by neonatal nurses  
83 in the NICU.

## 84 INTRODUCTION

85 Short and long-term neurodevelopmental outcomes are still a contemporary concern for infants that are  
86 born preterm, that is before the 37<sup>th</sup> week of gestation (WG) is completed,[1-3]. Compared to term infants,  
87 school-aged children born preterm have significant deficits in mathematics and reading,[1], present with  
88 lower Intellectual Quotients (IQ),[4], and are at increased risk for anxiety and hyperactivity disorders,[5].  
89 Throughout adulthood, young adults born preterm are still facing significant social-emotional difficulties,[3],  
90 present with lower IQ,[6], are even at increased risk for autistic symptoms,[7], and obtain lower scores on  
91 neuropsychological tests,[2]. The hospitalization in the Neonatal Intensive Care Unit (NICU) has been  
92 identified as a strategic period to implement interventions to protect and optimize preterm infant's  
93 neurodevelopment,[8]. In fact, the most important maturation processes of the central nervous system occur  
94 between the 24<sup>th</sup> and the 40<sup>th</sup> WG,[9].

95 The concept of Developmental Care (DC), based on the work of Dr. Heidelise Als,[10], is a neuroprotective  
96 NICU care philosophy that ultimately intends to promote optimal health outcomes in preterm infants and  
97 their families,[11-13]. An important aspect of DC is the individualisation of care that should match each  
98 infant and their family's needs,[13, 14] with the aim of lowering parental stress and maximizing their  
99 adaptation, as well as improving the infant's development,[14]. DC has proven to be effective in promoting  
100 mental and psychomotor development,[15], neurobehavior, and oral feeding,[16]; reducing NICU length of  
101 stay,[16], and lowering parental stress and anxiety,[17]. Thus, it appears important to scope the DC  
102 literature to identify specific interventions neonatal nurses can implement daily in their practice in order to  
103 optimize preterm infants' and families' outcomes.

104 However, it is unclear which specific interventions DC encompasses. Different authors have suggested  
105 groupings of DC interventions, which have been referred to as a DC model,[18, 19], practice guidelines,[12,  
106 20], a conceptual model,[21], core measures,[22], and standards of care [23-34]. For example, in their DC  
107 model, Altimier and Phillips,[18, 19] suggest there are seven neuroprotective DC core measures including:  
108 the healing environment (physical, sensory, smell/test, sound/noise, light), partnering with families,  
109 positioning and handling the infant, safeguarding sleep, minimizing stress and pain, protecting skin and  
110 optimizing nutrition. The Neonatal Association of Neonatal Nurses' practice guidelines,[12] and Coughlin,  
111 Gibbins et al.,[22] both suggest five core measures, such as: protected sleep, assessment & management  
112 of stress and pain, developmentally supportive activities of daily living, family-centered care and creating a  
113 healing environment. Gibbins, Hoath et al.,[21] in their universe of DC conceptual model suggest that DC  
114 interventions fit into 12 categories: monitoring/assessing, feeding, positioning, infection control, safety,  
115 comfort, thermoregulation, skin care, respiratory care, family, staff and environment. Lindacher,  
116 Altebaeumer [23] provide 96 European standards of care for newborn health on 11 overarching topic areas,  
117 including ten standards on infant- and family-centered developmental care [24] : case management and  
118 transition to home [25]; clinical consultation and supervision for healthcare professionals on supporting  
119 families [26]; education and training for infant- and family-centered developmental care [27]; family access

1  
2  
3 120 [28]; family support services [29]; management of the acoustic environment [30]; parental involvement [31];  
4 121 support for parental-infant bonding [32]; supportive sensory environment [33]; and very early and  
5 122 continuous skin-to-skin contact [34]. Finally, Browne, Jaeger [35] identify six key practice domains of infant  
6 123 and family centered developmental care in the intensive care unit: systems' thinking; positioning and touch  
7 124 for the newborn; sleep and arousal interventions for the newborn; skin-to-skin contact with intimate family  
8 125 members; reducing and managing pain and stress in newborns and families; and management of feeding,  
9 126 eating, and nutrition delivery. Still, it remains ambiguous which specific interventions fit into those global  
10 127 categories. For example, Jebreili, Neshat [36] evaluated the effectiveness of an olfactive stimulation  
11 128 intervention to manage procedural pain of preterm infants in the NICU. Although this intervention aims at  
12 129 reducing the preterm infant's pain, the authors do not identify it as a DC intervention, nor does it appear in  
13 130 any of the aforementioned groupings. To develop categories of DC interventions that are comprehensive  
14 131 for nursing, and inclusive we propose that DC interventions fall into eight categories. Our classification  
15 132 encompasses all categories suggested by the various abovementioned authors: family-centered care,  
16 133 feeding, positioning and handling, reduction and management of pain, sensory control, sensory stimulation,  
17 134 skin and routine care and sleep protection.

18  
19  
20  
21  
22  
23  
24  
25  
26 135 Even though DC is a multidisciplinary approach [13], DC interventions are primarily delivered by neonatal  
27 136 nurses,[14]. Indeed, by virtue of their field of practice, their professional skills and their unique proximity in  
28 137 the healthcare experience of preterm infants and their families, neonatal nurses are strategically positioned  
29 138 to implement DC interventions in the NICU,[14, 37]. However, the invisibility of the contribution of neonatal  
30 139 nursing to infants' health is a major concern, because it does not allow to distinguish their distinctive and  
31 140 exclusive role in NICU clinical practice,[38] along with how their involvement may favorably influence  
32 141 infants' health outcomes. The visibility of their specific contribution is compromised by the absence of a  
33 142 global portrait of nursing-sensitive outcome indicators that would allow us to better understand the effects  
34 143 and benefits of DC interventions in the NICU. Introduced by Maas, Johnson [39], the concept of "nursing-  
35 144 sensitive outcome indicator" refers to the distinct and measurable change in patient's state, behavior or  
36 145 perception as a result of a nursing intervention. In the past years, several initiatives to identify nursing-  
37 146 sensitive outcome indicators have emerged,[40-43]. Although these authors have identified nursing-  
38 147 sensitive outcome indicators, the former remain generic and some of these indicators, such as falls and  
39 148 incontinence, are not transferable to a neonatal population. Consequently, the range of implemented DC  
40 149 interventions remains unknown and the absence of specific nursing-sensitive outcome indicators related to  
41 150 these neonatal DC prevents the evaluation of nursing contribution to preterm infants' and families' well-  
42 151 being. A database of outcome indicators for neonatology was developed by The Canadian Neonatal  
43 152 Network,[44]. Nonetheless, the authors of this report did not specifically take into account outcome  
44 153 indicators that are specific to neonatal nursing DC interventions but rather observed medical outcomes  
45 154 such as sepsis, survival rates and cardiovascular complications rates. Moreover, 11 nursing-sensitive  
46 155 quality indicators for the NICU were developed in a study by Chen, Huang [45] but then again, these  
47 156 indicators are general to NICU care (i.e. rate of compliance to proper hand washing, rate of nosocomial

1  
2  
3 157 infections, etc.) and not specifically related to DC nursing interventions. Thus, there is a pressing need for  
4 158 a comprehensive mapping of nursing-sensitive outcome indicators with regard to DC interventions. Such  
5 159 effort is essential to identify outcome indicators that have been reported so far in the scientific literature and  
6 160 those that require further assessment, as well as to circumscribe the effects of DC interventions on  
7 161 delivered by nurses on preterm infants' and families' health and development.

10  
11 162 A preliminary search of PROSPERO, MEDLINE, the Cochrane Database of Systematic Reviews and the  
12 163 *Joanna Briggs Institute Database of Systematic Reviews and Implementation Reports* was conducted.  
13 164 Some systematic reviews have looked at the effectiveness of specific DC programs, such as the Newborn  
14 165 Individualized Developmental Care and Assessment Program [NIDCAP],[15], or the effectiveness of  
15 166 interventions on preterm infant's development or health outcomes,[16, 46-48]. To our knowledge, no current  
16 167 reviews scoping the literature on DC interventions have been published or is underway.

17  
18 168 Based on this lack of evidence, the primary objective for this scoping review is to: 1) identify the nature,  
19 169 range and extent of the literature regarding DC interventions in the NICU. The secondary objectives are  
20 170 twofold: 2) highlight DC interventions that fall into our eight identified categories of DC interventions; and 3)  
21 171 suggest nursing-sensitive outcome indicators related to DC interventions.

## 22 172 **REVIEW QUESTIONS**

23 173 The primary question guiding this scoping review is the following: What is the nature, range and the extent  
24 174 of the literature regarding DC interventions for preterm infants and families in the NICU?

25 175 The secondary questions addressed in this scoping review are: What are the interventions that have been  
26 176 associated with our eight DC categories in the NICU? What are the nursing-sensitive outcome indicators  
27 177 related to DC interventions in the NICU?

## 28 178 **METHODS**

29  
30 179 The proposed scoping review will be conducted in accordance with The Joanna Briggs Institute (JBI)  
31 180 methodology for scoping reviews,[49]. Moreover, as suggested by The JBI, this protocol is based upon the  
32 181 Preferred Reporting Items for Systematic reviews and Meta-Analyses extension for Scoping Reviews  
33 182 [PRISMA-ScR] Checklist (see Supplemental file 1),[50].

## 34 183 **Inclusion criteria**

### 35 184 **Participants**

36 185 We will consider studies that included preterm infants or their parents. For this review, we will consider the  
37 186 definition suggested by the World Health Organization stating that preterm infants are infants born before  
38 187 the 37<sup>th</sup> week of gestation is completed,[51].

## 188 Concept

189 We will consider studies that relate to one or many nursing interventions and that fit in one or more of our  
 190 identified categories of DC. For this review, as stated before, we established eight categories of DC nursing  
 191 interventions that encompass all major categories that are suggested in other DC model,[18, 19], practice  
 192 guidelines,[12, 20], conceptual model,[21], core measures,[22], and standards of care [23-34]. Those eight  
 193 categories are (see Table 1): sensory control, sensory stimulation, family-centered care, positioning and  
 194 handling, sleep protection, comfort, skin and routine care, and feeding. In other words, any paper that  
 195 discusses or is related to one or more specific nursing interventions that fall into one of these eight  
 196 categories will be included in this scoping review. Also, a DC intervention will be qualified as a nursing  
 197 intervention if it is delivered by nurses or if the intervention could be delivered by nurses as per their field  
 198 of practice. We will also consider interventions if they are delivered by parents themselves. For example, a  
 199 study evaluating a massage intervention (sensory stimulation) delivered by nurses would be eligible for  
 200 inclusion in this review. On the other hand, a study evaluating the effects of specific macro or micronutrients  
 201 (feeding) would be excluded because it would be qualified as a medical intervention.

202

203 **Table 1. DC categories according to different conceptual models, practice guidelines, core**  
 204 **measures and standards of care as well as categories for this review**

| Neuroprotective Core Measures [18, 19]                                                                                                                               | Core Measures for DC [12, 22]                                                           | Universe of DC [21]                                                                                                     | European Standards of Care for Newborn Health                                                                                                                                                                                                                                      | Key Practice Domains of Infant and Family Centered DC in the Intensive Care Unit [20, 35] | Our categories of DC nursing interventions for this review                                                                                                                                                                                                                             |
|----------------------------------------------------------------------------------------------------------------------------------------------------------------------|-----------------------------------------------------------------------------------------|-------------------------------------------------------------------------------------------------------------------------|------------------------------------------------------------------------------------------------------------------------------------------------------------------------------------------------------------------------------------------------------------------------------------|-------------------------------------------------------------------------------------------|----------------------------------------------------------------------------------------------------------------------------------------------------------------------------------------------------------------------------------------------------------------------------------------|
| <b>Healing environment</b><br>– Space;<br>– Privacy;<br>– Safety;<br>– Temperature;<br>– Touch;<br>– Proprioception;<br>– Smell;<br>– Taste;<br>– Sound;<br>– Light. | <b>Healing environment</b><br>– Light and noise;<br>– Healthcare workers collaboration. | <b>Environment</b><br>– Light levels;<br>– Noise levels;<br>– Cultural, racial, religious sensitivity;<br>– Leadership. | <b>Management of the acoustic environment [30];</b><br>– Noise reduction;<br>– Exposure to parental voice;<br>– Quiet hour;<br>– Etc..<br><br><b>Supportive sensory environment [33].</b><br>– Vocal, visual, olfactory and tactile parent-infant interactions;<br>– Skin-to-skin; |                                                                                           | <b>Sensory control</b><br>Nursing interventions controlling the preterm infant's sensory environment, that is reducing detrimental sensory stimulation.<br><br><b>Sensory stimulation</b><br>Nursing interventions providing appropriate sensorial stimulation for the preterm infant. |

|                                 |                             |                                                                                                                                                   |                                                                                                                                                                                                                                                                                                                                                                                                                                                                                                                                                                                                               |                                                                                                                                                                                                                                                                                                                                                                                                     |                                                                                                                                       |
|---------------------------------|-----------------------------|---------------------------------------------------------------------------------------------------------------------------------------------------|---------------------------------------------------------------------------------------------------------------------------------------------------------------------------------------------------------------------------------------------------------------------------------------------------------------------------------------------------------------------------------------------------------------------------------------------------------------------------------------------------------------------------------------------------------------------------------------------------------------|-----------------------------------------------------------------------------------------------------------------------------------------------------------------------------------------------------------------------------------------------------------------------------------------------------------------------------------------------------------------------------------------------------|---------------------------------------------------------------------------------------------------------------------------------------|
|                                 |                             |                                                                                                                                                   | <ul style="list-style-type: none"> <li>- Environmental noise reduction and light adjustment;</li> <li>- Minimization of painful, stressful stimuli;</li> <li>- Well-being and self-regulation;</li> <li>- Multisensory input during breastfeeding initiation;</li> <li>- Intimacy, quietness, and speech privacy;</li> <li>- Etc.</li> </ul>                                                                                                                                                                                                                                                                  |                                                                                                                                                                                                                                                                                                                                                                                                     |                                                                                                                                       |
| <b>Partnering with families</b> | <b>Family centered care</b> | <b>Family</b> <ul style="list-style-type: none"> <li>- Satisfaction;</li> <li>- Involvement</li> <li>- Knowledge;</li> <li>- Autonomy.</li> </ul> | <b>Case management and transition to home [25];</b> <ul style="list-style-type: none"> <li>- Parental involvement in planning and discharge;</li> <li>- Infant feeding, care, health management and development;</li> <li>- Etc.</li> </ul> <b>Family access [28];</b> <ul style="list-style-type: none"> <li>- 24-hour access for parents or family designated substitutes.</li> </ul> <b>Family support services [29];</b> <ul style="list-style-type: none"> <li>- Socio-economic support;</li> <li>- Psychological support;</li> <li>- Pastoral/spiritual support;</li> <li>- Postpartum care;</li> </ul> | <b>Skin-to-skin contact with intimate family members</b> <ul style="list-style-type: none"> <li>- Early, frequent, and prolonged skin-to-skin with parents;</li> <li>- Development, implementation, monitoring, and evaluation of skin-to-skin education and policies;</li> <li>- Assessment of infant's readiness, stability and response to transfer and skin-to-skin;</li> <li>- Etc.</li> </ul> | <b>Family centered care</b><br>Nursing interventions involving parents and families in their preterm infant's care plan and delivery. |



|                                 |                                                                                                                                                                                          |                    |                                                                                                                                                                                                                                                                                                                                                                                                                                                                                                                                                                                                                                                                                                                                                                                                                                                                   |                                                                                                                                                                                                                      |                                                                                                                                 |
|---------------------------------|------------------------------------------------------------------------------------------------------------------------------------------------------------------------------------------|--------------------|-------------------------------------------------------------------------------------------------------------------------------------------------------------------------------------------------------------------------------------------------------------------------------------------------------------------------------------------------------------------------------------------------------------------------------------------------------------------------------------------------------------------------------------------------------------------------------------------------------------------------------------------------------------------------------------------------------------------------------------------------------------------------------------------------------------------------------------------------------------------|----------------------------------------------------------------------------------------------------------------------------------------------------------------------------------------------------------------------|---------------------------------------------------------------------------------------------------------------------------------|
|                                 |                                                                                                                                                                                          |                    | <ul style="list-style-type: none"> <li>- Family daily activities;</li> <li>- Psycho-social support;</li> <li>- Parent associations' support;</li> <li>- Etc.</li> </ul> <p><b>Parental involvement [31];</b></p> <ul style="list-style-type: none"> <li>- Parents as primary caregivers;</li> <li>- Parents' participation in medical rounds, decision-making processes;</li> <li>- Etc.</li> </ul> <p><b>Support for parental-infant bonding [32];</b></p> <ul style="list-style-type: none"> <li>- Early parent-infant contact, closeness, and intimacy;</li> <li>- Psychological support to promote bonding;</li> <li>- Etc.</li> </ul> <p><b>Very early and continuous skin-to-skin contact [34].</b></p> <ul style="list-style-type: none"> <li>- Early and continuous skin-to-skin;</li> <li>- Early suckling and breastfeeding;</li> <li>- Etc.</li> </ul> |                                                                                                                                                                                                                      |                                                                                                                                 |
| <b>Positioning and handling</b> | <b>Developmentally supportive activities of daily living</b> <ul style="list-style-type: none"> <li>- Positioning;</li> <li>- Feeding;</li> <li>- Maintaining skin integrity.</li> </ul> | <b>Positioning</b> |                                                                                                                                                                                                                                                                                                                                                                                                                                                                                                                                                                                                                                                                                                                                                                                                                                                                   | <b>Positioning and touch for the newborn</b> <ul style="list-style-type: none"> <li>- Support of musculoskeletal, physiological, and behavioral stability;</li> <li>- Support of optimal cranial shaping,</li> </ul> | <b>Positioning and Handling</b><br>Nursing interventions that aim to: (1) position the preterm infant appropriately in the NICU |

|                                   |                                                                                                                                                                                                    |                                                                                                                                                                                     |  |                                                                                                                                                                                                                                                                                                                                                                                                                                                                     |                                                                                                                                                               |
|-----------------------------------|----------------------------------------------------------------------------------------------------------------------------------------------------------------------------------------------------|-------------------------------------------------------------------------------------------------------------------------------------------------------------------------------------|--|---------------------------------------------------------------------------------------------------------------------------------------------------------------------------------------------------------------------------------------------------------------------------------------------------------------------------------------------------------------------------------------------------------------------------------------------------------------------|---------------------------------------------------------------------------------------------------------------------------------------------------------------|
|                                   |                                                                                                                                                                                                    |                                                                                                                                                                                     |  | <p>prevention of torticollis and skull deformity;<br/>                 Touch by family and caregivers;<br/>                 Etc.</p>                                                                                                                                                                                                                                                                                                                                | <p>incubator or crib, during skin-to-skin or care delivery; (2) handle the preterm infant appropriately.</p>                                                  |
| <b>Safeguarding sleep</b>         | <p><b>Protected sleep</b></p> <ul style="list-style-type: none"> <li>- Sleep/wake-based care</li> <li>- Care that supports sleeping (swaddling, skin-to-skin);</li> <li>- Sleep safety.</li> </ul> | <p><b>Comfort</b></p> <ul style="list-style-type: none"> <li>- Pain assessment and management;</li> <li>- Skin-to-skin;</li> <li>- Massage;</li> <li>- Sleep regulation.</li> </ul> |  | <p><b>Sleep and arousal interventions for the newborn</b></p> <ul style="list-style-type: none"> <li>- Promotion of appropriate sleep/arousal states and sleep/wake cycles;</li> <li>- Modifications of the physical environment and caregiving routines (reduction of sound levels; natural lighting, adjustment of lighting and diurnal cycling; temperature; positioning aids);</li> <li>- Family presence and participation in care;</li> <li>- Etc.</li> </ul> | <p><b>Sleep protection</b><br/>                 Considering infant's sleep-wake cycle when providing care and promoting continuous and undisturbed sleep.</p> |
| <b>Minimizing stress and pain</b> | <p><b>Assessment and management of stress and pain</b></p>                                                                                                                                         |                                                                                                                                                                                     |  | <p><b>Reducing and managing pain and stress in newborns and families</b></p> <ul style="list-style-type: none"> <li>- Increase parental/caregiver well-being and decrease emotional distress;</li> <li>- Minimization of the impact of stressful and painful stimuli;</li> <li>- Etc.</li> </ul>                                                                                                                                                                    | <p><b>Reduction and management of pain</b><br/>                 Nursing interventions reducing, eliminating and/or managing procedural or prolonged pain.</p> |
| <b>Protecting skin</b>            |                                                                                                                                                                                                    | <p><b>Skin care</b></p>                                                                                                                                                             |  |                                                                                                                                                                                                                                                                                                                                                                                                                                                                     | <p><b>Skin and routine care</b><br/>                 Nursing interventions targeting care of the</p>                                                          |

|                             |    |                                                                                                                                                                                                                                                                                                                           |                                                                                                                                                                                                                                                                                                                                                                                                                                                                                                      |                                                                                                                                                                                                                                                                                                                          |                                                                                                                                                                        |
|-----------------------------|----|---------------------------------------------------------------------------------------------------------------------------------------------------------------------------------------------------------------------------------------------------------------------------------------------------------------------------|------------------------------------------------------------------------------------------------------------------------------------------------------------------------------------------------------------------------------------------------------------------------------------------------------------------------------------------------------------------------------------------------------------------------------------------------------------------------------------------------------|--------------------------------------------------------------------------------------------------------------------------------------------------------------------------------------------------------------------------------------------------------------------------------------------------------------------------|------------------------------------------------------------------------------------------------------------------------------------------------------------------------|
|                             |    |                                                                                                                                                                                                                                                                                                                           |                                                                                                                                                                                                                                                                                                                                                                                                                                                                                                      |                                                                                                                                                                                                                                                                                                                          | preterm infant's skin and hygiene care.                                                                                                                                |
| <b>Optimizing nutrition</b> |    | <b>Feeding</b> <ul style="list-style-type: none"> <li>- Early feeds (trophic, donor milk);</li> <li>- Cue-based feeding;</li> <li>- Nonnutritive sucking.</li> </ul>                                                                                                                                                      |                                                                                                                                                                                                                                                                                                                                                                                                                                                                                                      | <b>Management of feeding, eating and nutrition delivery</b> <ul style="list-style-type: none"> <li>- Behavior-based and baby- led feeding;</li> <li>- Breastfeeding promotion and support;</li> <li>- Optimization of nutrition;</li> <li>- Etc.</li> </ul>                                                              | <b>Feeding</b><br>Nursing interventions optimizing directly or indirectly (i.e. interventions preventing oral aversion) oral human milk feeding of the preterm infant. |
| --                          | -- | <b>Others</b> <ul style="list-style-type: none"> <li>- <b>Thermoregulation</b> (room temperature, swaddling, clothing, bedding, etc.);</li> <li>- <b>Head-to-toe Monitoring/Assessing</b>;</li> <li>- <b>Infection control</b>;</li> <li>- <b>Patient Safety measures</b>;</li> <li>- <b>Respiratory care.</b></li> </ul> | <b>Clinical consultation and supervision for healthcare professionals on supporting families [26];</b> <ul style="list-style-type: none"> <li>- Psycho-social and pastoral support;</li> <li>- Family support strategies;</li> <li>- Etc.</li> </ul><br><b>Education and training for infant- and family-centered developmental care [27];</b> <ul style="list-style-type: none"> <li>- Formal education and recurrent training;</li> <li>- Regularly updated guidelines;</li> <li>- Etc.</li> </ul> | <b>Systems thinking in complex adaptive systems</b> <ul style="list-style-type: none"> <li>- Leadership and governance infrastructure;</li> <li>- Interprofessional collaboration;</li> <li>- Evidence-based practice;</li> <li>- Continuous monitoring of practice;</li> <li>- Transparency;</li> <li>- Etc.</li> </ul> | --                                                                                                                                                                     |

205

206 As for outcomes, all outcomes measured during the NICU hospitalization will be considered for the inclusion  
207 of papers in the review. Papers that do not report any outcome as well as conference abstracts will be  
208 excluded.

## 209 Context

210 We will consider papers that discuss DC nursing interventions for preterm infants and their families during  
211 the NICU hospitalization only, that being before the infant is discharged home or transferred to another care

1  
2  
3 212 unit.  
4

5 213  
6  
7

## 8 214 Types of sources

9 215 In this scoping review we will consider quantitative, qualitative and mixed methods study designs for  
10 216 inclusion. In addition, literature reviews, text and opinion papers, practice guidelines and theoretical papers  
11 217 will be considered. Articles published in French or English will be included. Articles published from CINAHL,  
12 218 MEDLINE, Embase, PubMed, Web of Science, Scopus, ProQuest and PsychInfo databases from 2009 to  
13 219 the present will be included as modern DC interventions have mostly evolved in the past ten years.  
14  
15  
16  
17

## 18 220 Search strategy

19 221 The search strategy will aim to locate both published and unpublished primary studies, reviews and opinion  
20 222 papers pertaining to DC nursing interventions in the NICU. An initial search strategy was developed and  
21 223 piloted with a librarian, based on MESH databases. A full search strategy for CINAHL, MEDLINE, Embase,  
22 224 PubMed, Web of Science, Scopus, ProQuest and PsychInfo (see Table S1 - Supplemental file 2) was then  
23 225 proposed. Key concepts include neonatology, DC and nursing. The search strategy will be restricted to the  
24 226 last 10 years (2009-2019) due to the rise in publication in DC in the recent years. The search strategy,  
25 227 including all identified keywords and index terms will be adapted for each included information source.  
26  
27  
28  
29  
30

## 31 228 Information sources

32 229 In addition to the proposed databases (CINAHL, MEDLINE, Embase, PubMed, Web of Science, Scopus,  
33 230 ProQuest and PsychInfo), several gray literature sources will be hand-searched, including Google Scholar,  
34 231 the Grey Guide and clinical trial registries (clinicaltrial.gov, clinicaltrialregister.eu, isrctn.com, anzctr.org.au).  
35 232 References lists will also be analysed when appropriate to identify additional papers. Finally, a monthly  
36 233 bibliographic watch on DC prepared by our center's librarian  
37 234 (<https://soinsdudeveloppement.wordpress.com/>) will be reviewed and analysed for potential papers.  
38 235 Furthermore, authors with incomplete records will be contacted as needed to obtain supplemental  
39 236 information.  
40  
41  
42  
43  
44  
45  
46

## 47 237 Study selection

48 238 Following the search, all identified records will be collated and uploaded into Covidence systematic review  
49 239 software v1528 (Veritas Health Innovation, Melbourne, Australia; [www.covidence.org](http://www.covidence.org)) and duplicates  
50 240 removed. Seven review authors (MH, MA, AL, GDF, GL, AB, NF), in teams of two, will then screen titles  
51 241 and abstracts against the inclusion criteria as a means to pilot the specificity of inclusion criteria. Each  
52 242 reviewer will screen 250 articles to assess the criteria's performance and the team will further refine them  
53 243 accordingly. Criteria will be piloted again until performance is deemed adequate by all reviewers. Initial  
54  
55  
56  
57  
58  
59  
60

244 screening will be completed by one independent reviewer. Potentially relevant papers will be retrieved in  
245 full and their citation details imported into Covidence. The full text of selected citations will be assessed in  
246 detail against the inclusion criteria by the same seven review authors, in teams of two independently. Similar  
247 to the initial screening, inclusion criteria will be piloted and further refined before completing the full-text  
248 selection process. Reasons for exclusion of full text papers that do not meet the inclusion criteria will be  
249 recorded and reported in the scoping review. Any disagreements that arise between the reviewers at each  
250 stage of the selection process will be resolved with a third review author. The results of the search will be  
251 reported in full in the final scoping review and presented in a Preferred Reporting Items for Systematic  
252 Reviews and Meta-analyses flow diagram [52].

### 253 **Data extraction**

254 Data will be extracted from papers included in the scoping review by two independent reviewers using a  
255 data extraction tool developed by the review authors. Any disagreements that arise between the reviewers  
256 will be resolved through discussion, or with a third reviewer. The draft data extraction tool will be modified  
257 and revised as necessary during the pilot phase of extracting data from the first 20 included paper. Authors  
258 of papers will be contacted to request missing or additional data, where required. Modifications, if needed,  
259 will be detailed in the full scoping review.

### 260 **Data items**

261 To answer to our first two review questions, those being to describe the nature, range and extent of the  
262 literature as well as specific DC nursing interventions, the data extracted will include:

- 263 1. Descriptive data: authors, year of publication, country of origin, type of article and aim.
- 264 2. Methodological data: study design (if applicable), population (e.g. gestational age of the preterm infants  
265 at birth, inclusion or not of parents).
- 266 3. Data about the specific DC nursing intervention: category of DC intervention to which it pertains  
267 according to our proposed classification, details about the intervention as per the Description and  
268 Replication checklist [TIDieR],[53] when applicable – the intervention, the materials, the procedures,  
269 the provider(s), the modes of delivery, where, when and how much (frequency, duration and dose) as  
270 well as possibilities for tailoring the intervention.

271 A second data extraction process will be conducted to answer to our third review question, that is to highlight  
272 nursing-sensitive outcome indicators related to DC interventions. Thus, in order to identify nursing-sensitive  
273 outcome indicators, we will extract the following data only for papers with an experimental design:

- 274 4. Outcome data: outcomes measured, timing of outcome measure and reported results.

## 275 **Critical appraisal and secondary data synthesis**

276 Critical appraisal of included papers is not mandatory according to the scoping review JBI methodology,[49].  
277 Nevertheless, as per our third review question, we will critically appraise all studies with an experimental  
278 design using the Joanna Briggs Institute Checklist for Randomized Controlled Trials,[54]. Two independent  
279 review authors will complete the checklist for each experimental study and disagreements will be resolved  
280 by a third review author.

281 A secondary qualitative data synthesis of the outcomes reported in experimental studies will be conducted  
282 in order to highlight nursing-sensitive outcome indicators related to DC interventions in the NICU.  
283 Provisional outcome indicators will be shared with experts with a clinical or academic background in the  
284 field of quality of care and neonatology so they can provide guidance and ultimately validation. Detailed  
285 methodology that pertains to the third objective will be reported in the results paper.

## 286 **Data presentation**

287 Our primary and first secondary objective are to describe the extent, range and nature of the literature  
288 related to DC interventions as well as the specific nursing interventions that relate to DC. The extracted  
289 data will be presented in tabular form. A narrative summary will accompany the tabulated results and will  
290 describe how the results relate to the reviews objectives and questions. As per our other secondary  
291 objective to highlight nursing-sensitive outcome indicators related to DC interventions, data will be  
292 presented narratively.

## 293 **Patient and public involvement**

294 Patients and members of the public were not involved in the development of this protocol.

## 295 **ETHICS AND DISSEMINATION**

296 As this is a literature review project using already collected and published data, it will not be necessary to  
297 seek ethical approval from an Institutional Review Board. Results of this scoping review will be presented  
298 in scientific meetings and published in refereed papers. Our three objectives will be reported in three results  
299 papers.

## 300 **ACKNOWLEDGMENTS**

301 We would like to acknowledge the contribution of Valérie Lebel and Assia Mourid for the search strategy.

302

## 303 FUNDING

304 This scoping review is funded by the Quebec Network on Nursing Interventions/*Réseau de recherche en*  
305 *interventions en sciences infirmières du Québec* [RRISIQ]. Funders are not involved in any form in the  
306 review process.

## 307 COMPETING INTERESTS

308 The authors declare no conflict of interest.

## 309 DATA AVAILABILITY STATEMENT

310 No data are available as this is a systematic scoping review protocol.

## 311 PATIENT AND PUBLIC INVOLVEMENT

312 Patients or members of the public were not involved in the development of this protocol.

## 313 AUTHOR CONTRIBUTIONS

314 MH (PI) drafted the first version of the review protocol revised by MA and NF (Co-Is) to obtain funding from  
315 RRISIQ. AL wrote the first version of this manuscript with the contribution of MH, MA, GL, GD, and NF. All  
316 authors read and approved the final version. MH, GL and AB drafted the initial search strategy.

## 317 REFERENCES

- 318  
319 1. McBryde, M., et al., *Academic Outcomes of School-Aged Children Born Preterm: A Systematic*  
320 *Review and Meta-analysis*. JAMA Netw Open, 2020. **3**(4): p. e202027.
- 321 2. O'Reilly, H., et al., *Neuropsychological Outcomes at 19 Years of Age Following Extremely*  
322 *Preterm Birth*. Pediatrics, 2020. **145**(2).
- 323 3. Pyhala, R., et al., *Self-Reported Mental Health Problems Among Adults Born Preterm: A Meta-*  
324 *analysis*. Pediatrics, 2017. **139**(4).
- 325 4. Wolke, D., et al., *Universal gestational age effects on cognitive and basic mathematic processing:*  
326 *2 cohorts in 2 countries*. J Pediatr, 2015. **166**(6): p. 1410-6 e1-2.
- 327 5. Treyvaud, K., et al., *Psychiatric outcomes at age seven for very preterm children: rates and*  
328 *predictors*. J Child Psychol Psychiatry, 2013. **54**(7): p. 772-9.
- 329 6. Breeman, L.D., et al., *Preterm Cognitive Function Into Adulthood*. Pediatrics, 2015. **136**(3): p.  
330 415-23.

- 1  
2  
3 331 7. Eryigit-Madzwamuse, S., et al., *Personality of adults who were born very preterm*. Arch Dis Child  
4 332 Fetal Neonatal Ed, 2015. **100**(6): p. F524-9.
- 5  
6 333 8. Lavallée, A., et al., *Part 1: Narrative overview of developmental care interventions for the preterm*  
7 334 *newborn*. Journal of Neonatal Nursing, 2019. **25**(1): p. 3-8.
- 8  
9 335 9. Volpe, J.J., *Brain injury in premature infants: a complex amalgam of destructive and*  
10 336 *developmental disturbances*. Lancet Neurol, 2009. **8**(1): p. 110-24.
- 11  
12 337 10. Als, H., *Toward a Synactive Theory of Development: Promise for the Assessment and Support of*  
13 338 *Infant individuality*. Infant Mental Health Journal, 1982. **3**(4): p. 229-243.
- 14  
15 339 11. Als, H., *Developmental care in the newborn intensive care unit*. Current Opinion in Pediatrics,  
16 340 1998. **10**(2): p. 138-142.
- 17  
18 341 12. Kenner, C. and J.M. McGrath, *Developmental Care of Newborns and Infants*. 2 ed. 2010, Illinois:  
19 342 National Association of Neonatal Nurses.
- 20  
21 343 13. Aita, M. and L. Snider, *The art of developmental care in the NICU : a concept analysis*. Journal of  
22 344 Advanced Nursing, 2003. **41**(3): p. 223-232.
- 23  
24 345 14. Macho, P., *Individualized Developmental Care in the NICU: A Concept Analysis*. Adv Neonatal  
25 346 Care, 2017. **17**(3): p. 162-174.
- 26  
27 347 15. Ohlsson, A. and S.E. Jacobs, *NIDCAP: a systematic review and meta-analyses of randomized*  
28 348 *controlled trials*. Pediatrics, 2013. **131**(3): p. e881-93.
- 29  
30 349 16. Symington, A. and J. Pinelli, *Developmental care for promoting development and preventing*  
31 350 *morbidity in preterm infants*. Cochrane Database Syst Rev, 2009(2): p. CD001814.
- 32  
33 351 17. Ding, X., et al., *Effects of family-centred care interventions on preterm infants and parents in*  
34 352 *neonatal intensive care units: A systematic review and meta-analysis of randomised controlled*  
35 353 *trials*. Aust Crit Care, 2019. **32**(1): p. 63-75.
- 36  
37 354 18. Altimier, L. and R.M. Phillips, *The Neonatal Integrative Developmental Care Model: Seven*  
38 355 *Neuroprotective Core Measures for Family-Centered Developmental Care*. Newborn and Infant  
39 356 Nursing Reviews, 2013. **13**(1): p. 9-22.
- 40  
41 357 19. Altimier, L. and R.L.L.U.C.s.H.D.o.P.D.o.N.C.S.C.P.L.L.C.A. Phillips, *The Neonatal Integrative*  
42 358 *Developmental Care Model: Advanced Clinical Applications of the Seven Core Measures for*  
43 359 *Neuroprotective Family-centered Developmental Care*. Newborn and Infant Nursing Reviews,  
44 360 2016. **16**(4): p. 230-244.
- 45  
46 361 20. University of Notre Dame. *Report of the First Consensus Conference on Standards,*  
47 362 *Competencies and Best Practices for Infant and Family-Centered Developmental Care in the*  
48 363 *Intensive Care Unit*. 2019; Available from: <https://nicudesign.nd.edu/nicu-care-standards/>.
- 49  
50 364 21. Gibbins, S., et al., *The universe of developmental care: a new conceptual model for application in*  
51 365 *the neonatal intensive care unit*. Adv Neonatal Care, 2008. **8**(3): p. 141-7.



- 1  
2  
3 366 22. Coughlin, M., S. Gibbins, and S. Hoath, *Core measures for developmentally supportive care in*  
4 367 *neonatal intensive care units: theory, precedence and practice*. J Adv Nurs, 2009. **65**(10): p.  
5 368 2239-48.
- 7 369 23. Lindacher, V., et al., *European Standards of Care for Newborn Health-A project protocol*. Acta  
8 370 *paediatrica* (Oslo, Norway : 1992), 2021. **110**(5): p. 1433-1438.
- 10 371 24. European Foundation for the Care of Newborn Infants, *Infant- & family-centered development*  
11 372 *care*. 2018.
- 13 373 25. Damhuis, G., K. König, and al., *European Standards of Care for Newborn Health: Case*  
14 374 *management and transition to home.*, EFCNI, Editor. 2018.
- 16 375 26. Ahlqvist-Björkroth, S., B. Westrup, and al., *European Standards of Care for Newborn Health:*  
17 376 *Clinical consultation and supervision for healthcare professionals on supporting families*. 2018.
- 19 377 27. Warren, I., B. Westrup, and al., *European Standards of Care for Newborn Health: Education and*  
20 378 *training for infant- and family-centred developmental care (IFCDC)*. 2018.
- 22 379 28. Westrup, B., P. Kuhn, and al., *European Standards of Care for Newborn Health: Family access*.  
23 380 2018.
- 24 381 29. Westrup, B., P. Kuhn, and al., *European Standards of Care for Newborn Health: Family support*  
25 382 *services*. 2018.
- 27 383 30. Sizun, J., B. Hallberg, and al., *European Standards of Care for Newborn Health: Management of*  
28 384 *the acoustic environment*. 2018.
- 30 385 31. Pallás-Alonso, C., B. Westrup, and al., *European Standards of Care for Newborn Health: Parental*  
31 386 *involvement*. 2018.
- 33 387 32. Montirosso, R., B. Westrup, and al., *European Standards of Care for Newborn Health: Support for*  
34 388 *parental-infant bonding*. 2018.
- 36 389 33. Kuhn, P., B. Westrup, and al., *European Standards of Care for Newborn Health: Supportive*  
37 390 *sensory environment*. 2018.
- 39 391 34. Bergman, N.J., B. Westrup, and al., *European Standards of Care for Newborn Health: Very early*  
40 392 *and continuous skin-to-skin contact*. 2018.
- 42 393 35. Browne, J.V., C.B. Jaeger, and C. Kenner, *Executive summary: standards, competencies, and*  
43 394 *recommended best practices for infant- and family-centered developmental care in the intensive*  
44 395 *care unit*. Journal of Perinatology, 2020. **40**(Suppl 1): p. 5-10.
- 46 396 36. Jebreili, M., et al., *Comparison of Breastmilk Odor and Vanilla Odor on Mitigating Premature*  
47 397 *Infants' Response to Pain During and After Venipuncture*. Breastfeed Med, 2015. **10**(7): p. 362-5.
- 49 398 37. Lavallée, A., et al., *PART 2: Practice and research recommendations for quality developmental*  
50 399 *care in the NICU*. Journal of Neonatal Nursing, 2019.
- 52 400 38. Eklund, W. and C. Kenner, *Council of International Neonatal Nurses (COINN) Global Neonatal*  
53 401 *Provider Database Initiative (CGNPD): Results From an Implementation Focus Group*. Adv  
54 402 *Neonatal Care*, 2015. **15**(6): p. 407-15.

- 1  
2  
3 403 39. Maas, M.L., M. Johnson, and S. Moorhead, *Classifying Nursing-Sensitive Patient Outcomes*.  
4 404 Image: the Journal of Nursing Scholarship, 1996. **28**(4): p. 295-302.  
5  
6 405 40. Dubois, C.A., et al., *Indicateurs prioritaires pour évaluer la contribution infirmière à la qualité des*  
7 406 *soins*. 2015: SIDIIEF.  
8  
9 407 41. National Quality Forum, *National Voluntary Consensus Standards for Nursing-Sensitive Care: An*  
10 408 *Initial Performance Measure Set*. 2004.  
11  
12 409 42. Danielis, M., et al., *What nursing sensitive outcomes have been studied to-date among patients*  
13 410 *cared for in intensive care units? Findings from a scoping review*. International Journal of Nursing  
14 411 Studies, 2020. **102**.  
15  
16 412 43. Montalvo, I., *The National Database of Nursing Quality Indicators™ (NDNQI®)*. OJIN: The  
17 413 Online Journal of Issues in Nursing, 2007. **12**(3).  
18  
19 414 44. The Canadian Neonatal Network, *Annual Report*. 2019.  
20  
21 415 45. Chen, L., et al., *Using the Delphi method to develop nursing-sensitive quality indicators for the*  
22 416 *NICU*. J Clin Nurs, 2017. **26**(3-4): p. 502-513.  
23  
24 417 46. Legendre, V., et al., *The evolving practice of developmental care in the neonatal unit: a*  
25 418 *systematic review*. Phys Occup Ther Pediatr, 2011. **31**(3): p. 315-38.  
26  
27 419 47. Burke, S., *Systematic review of developmental care interventions in the neonatal intensive care*  
28 420 *unit since 2006*. J Child Health Care, 2018. **22**(2): p. 269-286.  
29  
30 421 48. Soleimani, F., et al., *Do NICU developmental care improve cognitive and motor outcomes for*  
31 422 *preterm infants? A systematic review and meta-analysis*. BMC Pediatr, 2020. **20**(1): p. 67.  
32  
33 423 49. Peters, M.D.J., et al., *Scoping Reviews*, in *Joanna Briggs Institute Reviewer's Manual*, E.  
34 424 Aromataris and Z. Munn, Editors. 2020.  
35  
36 425 50. Tricco, A.C., et al., *PRISMA Extension for Scoping Reviews (PRISMA-ScR): Checklist and*  
37 426 *Explanation*. Ann Intern Med, 2018. **169**(7): p. 467-473.  
38  
39 427 51. World Health Organization. *Preterm birth*. 2020; Available from: [https://www.who.int/news-](https://www.who.int/news-room/fact-sheets/detail/preterm-birth#:~:text=Preterm%20is%20defined%20as%20babies,preterm%20(28%20to%2032%20weeks))  
40 429 [room/fact-sheets/detail/preterm-](https://www.who.int/news-room/fact-sheets/detail/preterm-birth#:~:text=Preterm%20is%20defined%20as%20babies,preterm%20(28%20to%2032%20weeks))  
41 430 [birth#:~:text=Preterm%20is%20defined%20as%20babies,preterm%20\(28%20to%2032%20week](https://www.who.int/news-room/fact-sheets/detail/preterm-birth#:~:text=Preterm%20is%20defined%20as%20babies,preterm%20(28%20to%2032%20weeks))  
42 431 [s\)](https://www.who.int/news-room/fact-sheets/detail/preterm-birth#:~:text=Preterm%20is%20defined%20as%20babies,preterm%20(28%20to%2032%20weeks)).  
43  
44 431 52. Moher, D., et al., *Preferred reporting items for systematic reviews and meta-analyses: the*  
45 432 *PRISMA statement*. J Clin Epidemiol, 2009. **62**(10): p. 1006-12.  
46  
47 433 53. Hoffmann, T.C., et al., *Better reporting of interventions: template for intervention description and*  
48 434 *replication (TIDieR) checklist and guide*. BMJ, 2014. **348**: p. g1687.  
49  
50 435 54. Joanna Briggs Institute *Checklist for Randomized Controlled Trials*. 2017.

436

## Preferred Reporting Items for Systematic reviews and Meta-Analyses extension for Scoping Reviews (PRISMA-ScR) Checklist

| SECTION                                               | ITEM | PRISMA-ScR CHECKLIST ITEM                                                                                                                                                                                                                                                                                  | REPORTED ON PAGE # |
|-------------------------------------------------------|------|------------------------------------------------------------------------------------------------------------------------------------------------------------------------------------------------------------------------------------------------------------------------------------------------------------|--------------------|
| <b>TITLE</b>                                          |      |                                                                                                                                                                                                                                                                                                            |                    |
| Title                                                 | 1    | Identify the report as a scoping review.                                                                                                                                                                                                                                                                   |                    |
| <b>ABSTRACT</b>                                       |      |                                                                                                                                                                                                                                                                                                            |                    |
| Structured summary                                    | 2    | Provide a structured summary that includes (as applicable): background, objectives, eligibility criteria, sources of evidence, charting methods, results, and conclusions that relate to the review questions and objectives.                                                                              |                    |
| <b>INTRODUCTION</b>                                   |      |                                                                                                                                                                                                                                                                                                            |                    |
| Rationale                                             | 3    | Describe the rationale for the review in the context of what is already known. Explain why the review questions/objectives lend themselves to a scoping review approach.                                                                                                                                   |                    |
| Objectives                                            | 4    | Provide an explicit statement of the questions and objectives being addressed with reference to their key elements (e.g., population or participants, concepts, and context) or other relevant key elements used to conceptualize the review questions and/or objectives.                                  |                    |
| <b>METHODS</b>                                        |      |                                                                                                                                                                                                                                                                                                            |                    |
| Protocol and registration                             | 5    | Indicate whether a review protocol exists; state if and where it can be accessed (e.g., a Web address); and if available, provide registration information, including the registration number.                                                                                                             |                    |
| Eligibility criteria                                  | 6    | Specify characteristics of the sources of evidence used as eligibility criteria (e.g., years considered, language, and publication status), and provide a rationale.                                                                                                                                       |                    |
| Information sources*                                  | 7    | Describe all information sources in the search (e.g., databases with dates of coverage and contact with authors to identify additional sources), as well as the date the most recent search was executed.                                                                                                  |                    |
| Search                                                | 8    | Present the full electronic search strategy for at least 1 database, including any limits used, such that it could be repeated.                                                                                                                                                                            |                    |
| Selection of sources of evidence†                     | 9    | State the process for selecting sources of evidence (i.e., screening and eligibility) included in the scoping review.                                                                                                                                                                                      |                    |
| Data charting process‡                                | 10   | Describe the methods of charting data from the included sources of evidence (e.g., calibrated forms or forms that have been tested by the team before their use, and whether data charting was done independently or in duplicate) and any processes for obtaining and confirming data from investigators. |                    |
| Data items                                            | 11   | List and define all variables for which data were sought and any assumptions and simplifications made.                                                                                                                                                                                                     |                    |
| Critical appraisal of individual sources of evidence§ | 12   | If done, provide a rationale for conducting a critical appraisal of included sources of evidence; describe the methods used and how this information was used in any data synthesis (if appropriate).                                                                                                      |                    |
| Synthesis of results                                  | 13   | Describe the methods of handling and summarizing the data that were charted.                                                                                                                                                                                                                               |                    |

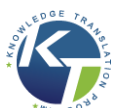

| SECTION                                       | ITEM | PRISMA-ScR CHECKLIST ITEM                                                                                                                                                                       | REPORTED ON PAGE # |
|-----------------------------------------------|------|-------------------------------------------------------------------------------------------------------------------------------------------------------------------------------------------------|--------------------|
| <b>RESULTS</b>                                |      |                                                                                                                                                                                                 |                    |
| Selection of sources of evidence              | 14   | Give numbers of sources of evidence screened, assessed for eligibility, and included in the review, with reasons for exclusions at each stage, ideally using a flow diagram.                    |                    |
| Characteristics of sources of evidence        | 15   | For each source of evidence, present characteristics for which data were charted and provide the citations.                                                                                     |                    |
| Critical appraisal within sources of evidence | 16   | If done, present data on critical appraisal of included sources of evidence (see item 12).                                                                                                      |                    |
| Results of individual sources of evidence     | 17   | For each included source of evidence, present the relevant data that were charted that relate to the review questions and objectives.                                                           |                    |
| Synthesis of results                          | 18   | Summarize and/or present the charting results as they relate to the review questions and objectives.                                                                                            |                    |
| <b>DISCUSSION</b>                             |      |                                                                                                                                                                                                 |                    |
| Summary of evidence                           | 19   | Summarize the main results (including an overview of concepts, themes, and types of evidence available), link to the review questions and objectives, and consider the relevance to key groups. |                    |
| Limitations                                   | 20   | Discuss the limitations of the scoping review process.                                                                                                                                          |                    |
| Conclusions                                   | 21   | Provide a general interpretation of the results with respect to the review questions and objectives, as well as potential implications and/or next steps.                                       |                    |
| <b>FUNDING</b>                                |      |                                                                                                                                                                                                 |                    |
| Funding                                       | 22   | Describe sources of funding for the included sources of evidence, as well as sources of funding for the scoping review. Describe the role of the funders of the scoping review.                 |                    |

JBI = Joanna Briggs Institute; PRISMA-ScR = Preferred Reporting Items for Systematic reviews and Meta-Analyses extension for Scoping Reviews.

\* Where *sources of evidence* (see second footnote) are compiled from, such as bibliographic databases, social media platforms, and Web sites.

† A more inclusive/heterogeneous term used to account for the different types of evidence or data sources (e.g., quantitative and/or qualitative research, expert opinion, and policy documents) that may be eligible in a scoping review as opposed to only studies. This is not to be confused with *information sources* (see first footnote).

‡ The frameworks by Arksey and O'Malley (6) and Levac and colleagues (7) and the JBI guidance (4, 5) refer to the process of data extraction in a scoping review as data charting.

§ The process of systematically examining research evidence to assess its validity, results, and relevance before using it to inform a decision. This term is used for items 12 and 19 instead of "risk of bias" (which is more applicable to systematic reviews of interventions) to include and acknowledge the various sources of evidence that may be used in a scoping review (e.g., quantitative and/or qualitative research, expert opinion, and policy document).

From: Tricco AC, Lillie E, Zarin W, O'Brien KK, Colquhoun H, Levac D, et al. PRISMA Extension for Scoping Reviews (PRISMA-ScR): Checklist and Explanation. *Ann Intern Med.* 2018;169:467–473. doi: [10.7326/M18-0850](https://doi.org/10.7326/M18-0850).



## SUPPLEMENTAL FILE 2: EXAMPLE OF OUR SEARCH STRATEGY

**Table S1. Search strategy in CINAHL**

| Search                    | CINAHL (octobre, 2019)                                                                                                                                                                                                                                                                                                                                                                                                                                                                                                                                                                                                                                                                                                                     | Records retrieved |
|---------------------------|--------------------------------------------------------------------------------------------------------------------------------------------------------------------------------------------------------------------------------------------------------------------------------------------------------------------------------------------------------------------------------------------------------------------------------------------------------------------------------------------------------------------------------------------------------------------------------------------------------------------------------------------------------------------------------------------------------------------------------------------|-------------------|
| #1 Subject heading search | (MH "Evaluation and Quality Improvement Program") OR (MH "Magnet Hospital Accreditation") OR (MH "Joint Commission") OR (MH "Quality Patient Care Scale") OR (MH "Nursing Practice, Evidence-Based+") OR (MH "Nursing Assessment") OR (MH "Health Care Delivery") OR (MH "Health Care Delivery, Integrated") OR (MH "Health Resource Allocation") OR (MH "Health Resource Utilization") OR (MH "Accountable Care Organizations") OR (MH "Health Care Reform") OR (MH "Health Services Accessibility") OR (MH "Program Evaluation") OR (MH "Quality of Care Research") OR (MH "Performance Measurement Systems") OR (MH "Health Status Indicators") OR (MH "Clinical Assessment Tools") OR (MH "Quality of Health Care+")                   | 958,800           |
| #2 Subject heading search | (MH "Intensive Care Units, Neonatal") OR (MH "Neonatal Assessment+") OR (MH "Neonatal Intensive Care Nursing") OR (MH "Intensive Care, Neonatal") OR (MH "Neonatal Nurse Practitioners") OR (MH "Neonatal Nursing") OR (MH "Infant, Low Birth Weight+") OR (MH "Infant, Premature") OR (MH "Infant, Hospitalized") OR (MH "Infant, High Risk") OR (MH "Infant, Drug-Exposed")                                                                                                                                                                                                                                                                                                                                                              | 47,945            |
| #3 Subject heading search | Nurs*                                                                                                                                                                                                                                                                                                                                                                                                                                                                                                                                                                                                                                                                                                                                      | 173,295           |
| #4 keyword search         | TI( Indicator* OR quality OR performance OR outcome* OR metrics OR standard* OR (evidence* N2 practice) OR benchmarking OR "report card*" OR "EBP" OR (Evidence* N2 nursing) OR "EBN" OR "practice guidelines" OR (program* N3 evaluati* ) OR AB ( Indicator* OR quality OR performance OR outcome* OR metrics OR standard* OR (evidence* N2 practice) OR benchmarking OR "report card*" OR "EBP" OR (Evidence* N2 nursing) OR "EBN" OR "practice guidelines" OR (program* N3 evaluati* ) OR MW ( Indicator* OR quality OR performance OR outcome* OR metrics OR standard* OR (evidence* N2 practice) OR benchmarking OR "report card*" OR "EBP" OR (Evidence* N2 nursing) OR "EBN" OR "practice guidelines" OR (program* N3 evaluati* ) ) | 1,665,707         |
| #5 keyword search         | TI ( ((preterm OR "pre-term" OR premature OR (low* N2 Weight) OR small*) AND (newborn* OR infant* OR bab* OR child*)) OR Neonat* ) OR AB ( ((preterm OR "pre-term" OR premature OR (low* N2 Weight) OR small*) AND (newborn* OR infant* OR bab* OR child*)) OR Neonat* ) OR MW ( ((preterm OR "pre-term" OR premature OR (low* N2 Weight) OR small*) AND (newborn* OR infant* OR bab* OR child*)) OR Neonat* )                                                                                                                                                                                                                                                                                                                             | 114,605           |

|                                                                                            |                                          |           |
|--------------------------------------------------------------------------------------------|------------------------------------------|-----------|
| #6<br>keyword<br>search                                                                    | TX nurs*                                 | 1,678,740 |
| #4                                                                                         | (#1 AND #2 AND #3) OR (#4 AND #5 AND #6) | 7991      |
| Limited to 2009-current, french and english<br>(DT 2009-current AND LA(english OR french)) |                                          |           |

For peer review only
