# Supplementary material for: Comprehensive mapping of NICU developmental care nursing interventions and related sensitive outcome indicators: a scoping review protocol
Source: PubMed Central journal article supplement — BMJ Open. 2022 Jan 31;12(1):e046807. doi: 10.1136/bmjopen-2020-046807 (PMC8808373; doi:10.1136/bmjopen-2020-046807), 2022-01-31
Supplement: bmjopen-2020-046807supp002.pdf [file bmjopen-2020-046807supp002.pdf]

**SUPPLEMENTAL FILE 2: EXAMPLE OF OUR SEARCH STRATEGY****Table S1. Search strategy in CINAHL**

| Search                    | CINAHL (December 2021)                                                                                                                                                                                                                                                                                                                                                                                                                                                                                                                                                                                                                                                                                                                     | Records retrieved |
|---------------------------|--------------------------------------------------------------------------------------------------------------------------------------------------------------------------------------------------------------------------------------------------------------------------------------------------------------------------------------------------------------------------------------------------------------------------------------------------------------------------------------------------------------------------------------------------------------------------------------------------------------------------------------------------------------------------------------------------------------------------------------------|-------------------|
| #1 Subject heading search | (MH "Evaluation and Quality Improvement Program") OR (MH "Magnet Hospital Accreditation") OR (MH "Joint Commission") OR (MH "Quality Patient Care Scale") OR (MH "Nursing Practice, Evidence-Based+") OR (MH "Nursing Assessment") OR (MH "Health Care Delivery") OR (MH "Health Care Delivery, Integrated") OR (MH "Health Resource Allocation") OR (MH "Health Resource Utilization") OR (MH "Accountable Care Organizations") OR (MH "Health Care Reform") OR (MH "Health Services Accessibility") OR (MH "Program Evaluation") OR (MH "Quality of Care Research") OR (MH "Performance Measurement Systems") OR (MH "Health Status Indicators") OR (MH "Clinical Assessment Tools") OR (MH "Quality of Health Care+")                   | 1,191,077         |
| #2 Subject heading search | (MH "Intensive Care Units, Neonatal") OR (MH "Neonatal Assessment+") OR (MH "Neonatal Intensive Care Nursing") OR (MH "Intensive Care, Neonatal") OR (MH "Neonatal Nurse Practitioners") OR (MH "Neonatal Nursing") OR (MH "Infant, Low Birth Weight+") OR (MH "Infant, Premature") OR (MH "Infant, Hospitalized") OR (MH "Infant, High Risk") OR (MH "Infant, Drug-Exposed")                                                                                                                                                                                                                                                                                                                                                              | 58,772            |
| #3 Subject heading search | (MH "Nurses")                                                                                                                                                                                                                                                                                                                                                                                                                                                                                                                                                                                                                                                                                                                              | 70,103            |
| #4 keyword search         | TI( Indicator* OR quality OR performance OR outcome* OR metrics OR standard* OR (evidence* N2 practice) OR benchmarking OR "report card*" OR "EBP" OR (Evidence* N2 nursing) OR "EBN" OR "practice guidelines" OR (program* N3 evaluati* ) OR AB ( Indicator* OR quality OR performance OR outcome* OR metrics OR standard* OR (evidence* N2 practice) OR benchmarking OR "report card*" OR "EBP" OR (Evidence* N2 nursing) OR "EBN" OR "practice guidelines" OR (program* N3 evaluati* ) OR MW ( Indicator* OR quality OR performance OR outcome* OR metrics OR standard* OR (evidence* N2 practice) OR benchmarking OR "report card*" OR "EBP" OR (Evidence* N2 nursing) OR "EBN" OR "practice guidelines" OR (program* N3 evaluati* ) ) | 2,112,948         |

|                                                                                            |                                                                                                                                                                                                                                                                                                                                                                                                                     |           |
|--------------------------------------------------------------------------------------------|---------------------------------------------------------------------------------------------------------------------------------------------------------------------------------------------------------------------------------------------------------------------------------------------------------------------------------------------------------------------------------------------------------------------|-----------|
| #5<br>keyword<br>search                                                                    | TI ( ((preterm OR "pre-term" OR premature OR (low* N2 Weight) OR small*) AND (newborn* OR infant* OR bab* OR child*)) OR Neonat* )<br>OR AB ( ((preterm OR "pre-term" OR premature OR (low* N2 Weight) OR small*) AND (newborn* OR infant* OR bab* OR child*)) OR Neonat* ) OR MW ( ((preterm OR "pre-term" OR premature OR (low* N2 Weight) OR small*) AND (newborn* OR infant* OR bab* OR child*)) OR Neonat* ) ) | 146,015   |
| #6<br>keyword<br>search                                                                    | TX nurs*                                                                                                                                                                                                                                                                                                                                                                                                            | 2,008,171 |
| #7                                                                                         | (#1 AND #2 AND #3) OR (#4 AND #5 AND #6)                                                                                                                                                                                                                                                                                                                                                                            | 16,093    |
| Limited to 2009-current, french and english<br>(DT 2009-current AND LA(english OR french)) |                                                                                                                                                                                                                                                                                                                                                                                                                     | 11,104    |
